# Supplementary material for: iTRAQ-based proteomic and physiological analyses of broccoli sprouts in response to exogenous melatonin with ZnSO4 stress
Source: Royal Society of Chemistry journal article supplement (doi:10.1039/d1ra00696g), 2021-01-01
Supplement: d1ra00696g1.pdf [file d1ra00696g1.pdf]

1 **Supplementary Figure Captions:**

2 **Supplementary Fig. S1** Hierarchical clustering analysis of the relative abundance profiles in  
3 broccoli sprouts with different functions. Abundance changes were made based on the log<sub>2</sub>  
4 conversion expression ratios of the proteins applying Gene Cluster 3.0 software. Visualize results  
5 using JAVA Treeview software. a: ZnSO<sub>4</sub> vs CK; b: Melatonin vs CK; c: ZnSO<sub>4</sub>+Melatonin vs  
6 ZnSO<sub>4</sub>; d: ZnSO<sub>4</sub>+Melatonin vs melatonin.

7 **Supplementary Fig. S2** Mass spectrogram of different fractions.

8

9 **Supplementary Table Captions:**

10 **Supplementary Table S1** The primer sequence of ITCs metabolism genes in broccoli sprouts.

11 **Supplementary Table S2** Mass spectrometric data of eight fractions.

12 **Supplementary Table S3** Differentially abundant proteins in broccoli sprouts under different  
13 treatments.

14

15

16

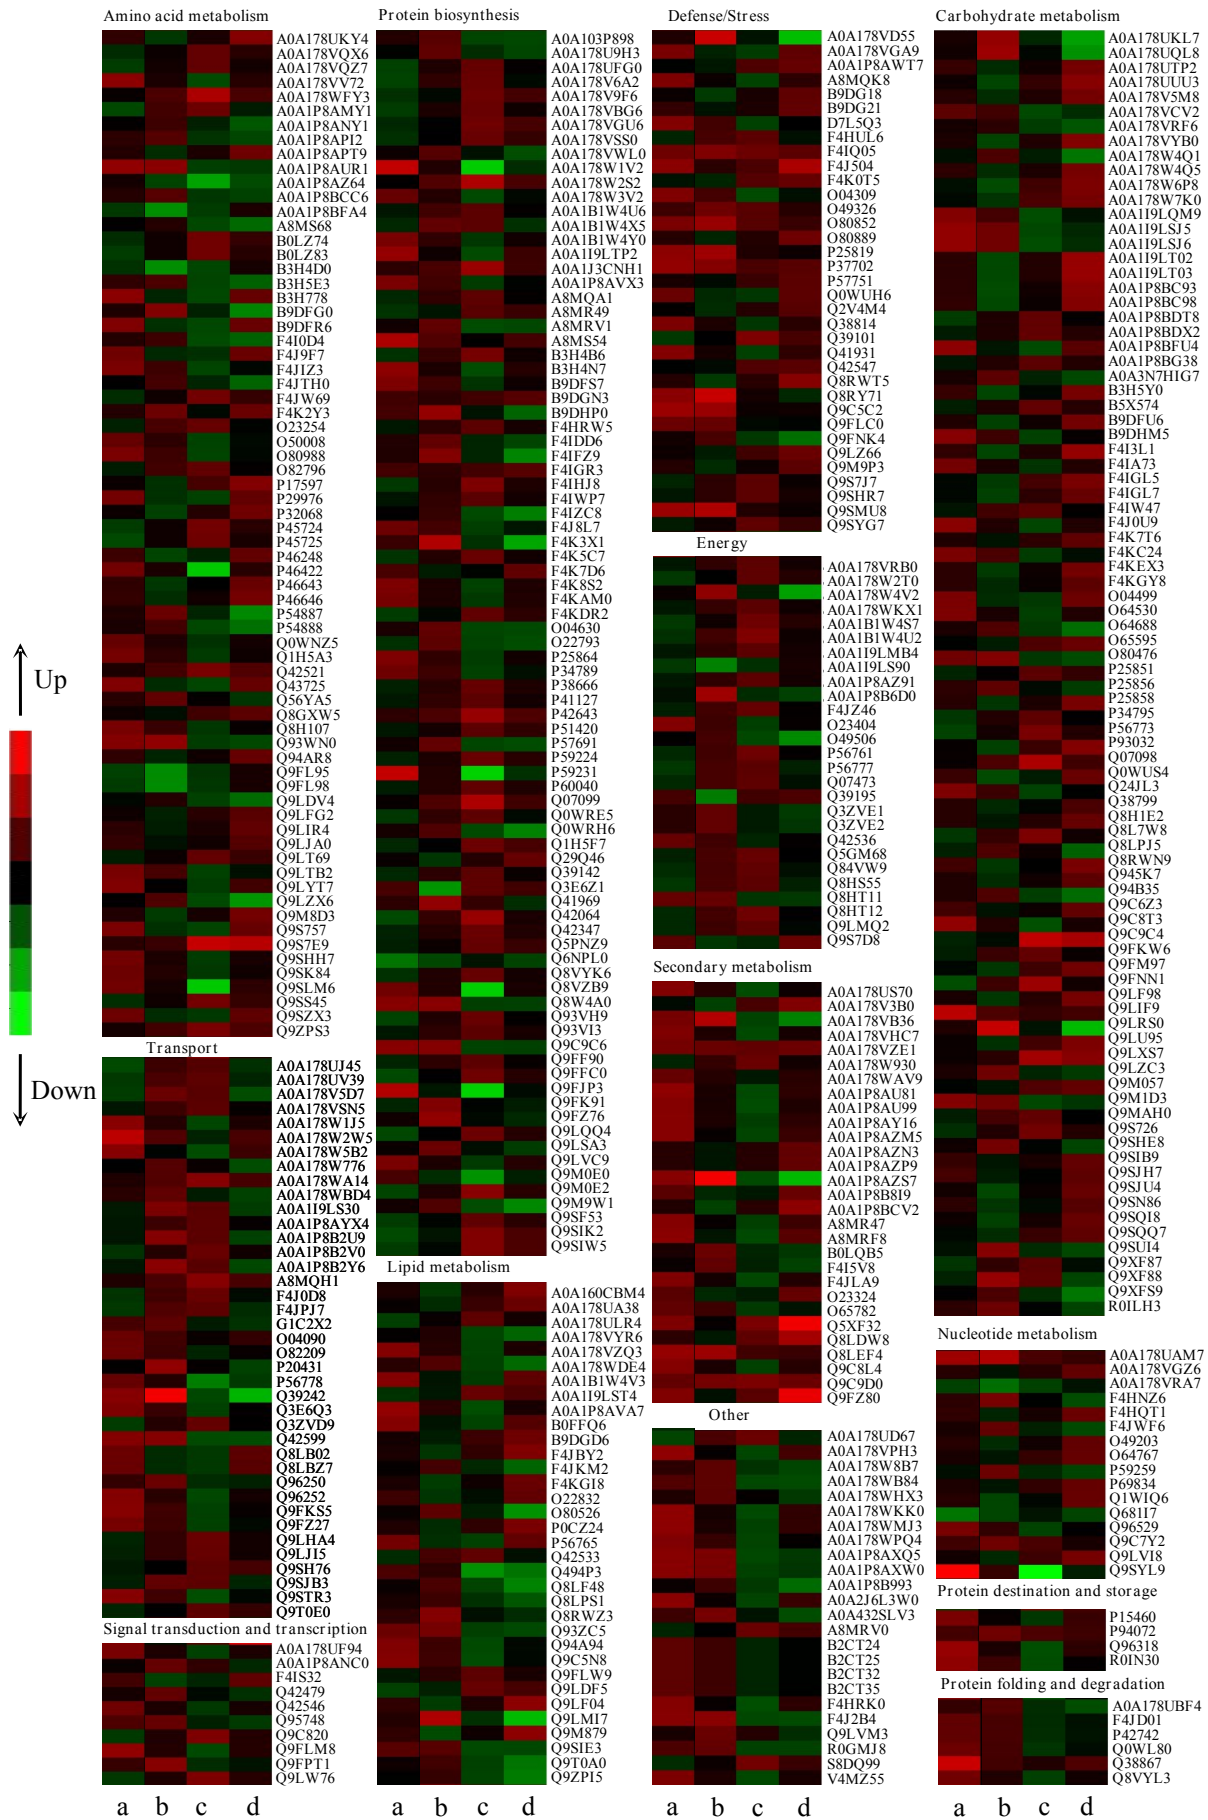

17

18 Supplementary Fig. S1

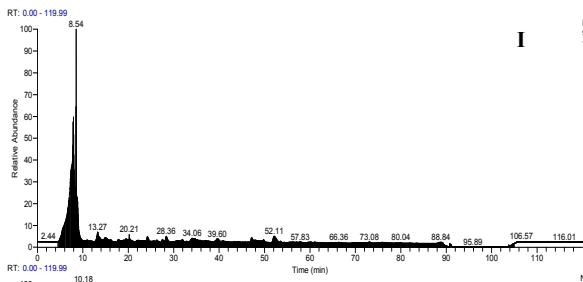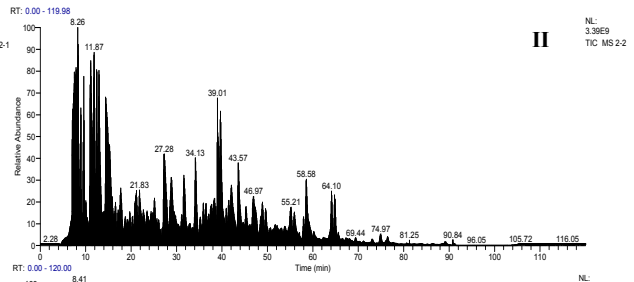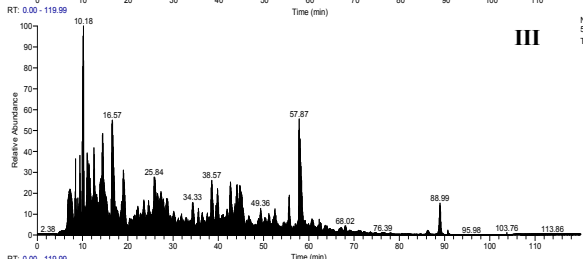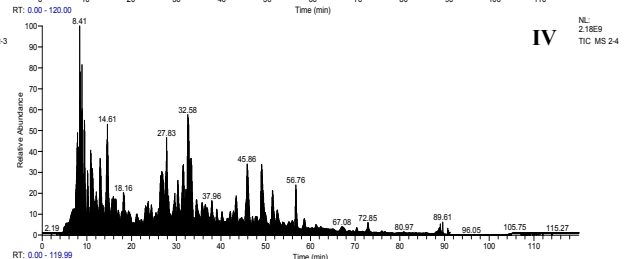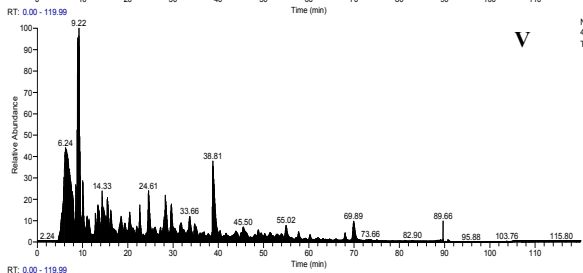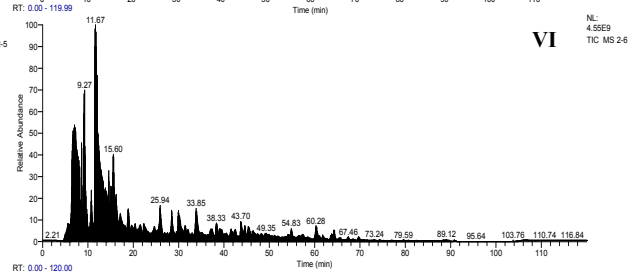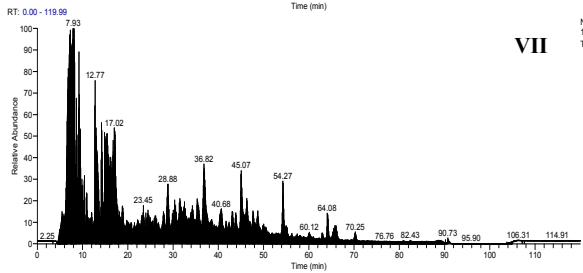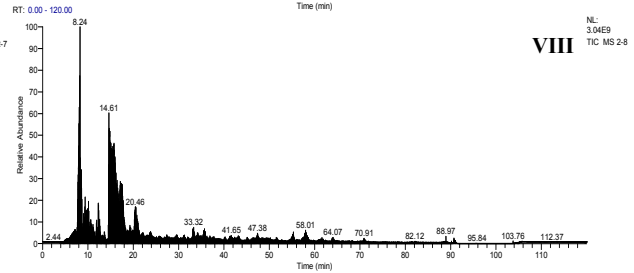

19

20 Supplementary Fig. S2

22 Supplementary Table S1. The primer sequence of ITCs metabolism genes in broccoli sprouts

| Primer  | Sequences (5'-3')                    |
|---------|--------------------------------------|
| UGT74B1 | <b>F:</b> CAAAGACGATAAAAGGCTACGGC    |
|         | <b>R:</b> TCCCAAAGGAACCAAACGAA       |
| ST5b    | <b>F:</b> CCGACACTACCTTACCGAACCA     |
|         | <b>R:</b> CGTGAGGAAAAGAGGCGATG       |
| OX      | <b>F:</b> GTGGACATTATAACCGAACCTTACG  |
|         | <b>R:</b> TGTGGACTTCTTTGGCGACCT      |
| MYR     | <b>F:</b> AAGGTCATCAGGGAGAAGGGTG     |
|         | <b>R:</b> TGTTTGGCAGGGTTCTTAGTGG     |
| MYB28   | <b>F:</b> AGACTGCGATGGACTAACTACCTAAA |
|         | <b>R:</b> CCGACCACTTGTTCACGA         |
| CYP83A1 | <b>F:</b> CTGCGGCGGTTGTATGGG         |
|         | <b>R:</b> AAGTTCTTCACGTCGTCTTCAGT    |
| ESP     | <b>F:</b> ACATTTGGGACCAGGGACG        |
|         | <b>R:</b> TTCCATACACGGTGGCAGTC       |
| AOP2    | <b>F:</b> GAGTAACGGAAAGAAAGAAGACAAGG |
|         | <b>R:</b> ATAAGCGTGAAGAGTAGAACGAGGT  |
| BoSAT1  | <b>F:</b> ATATCCATCCAGCAGCGAAG       |
|         | <b>R:</b> CTGTCTCCGCAAGCTTTACC       |
| BoHMT1  | <b>F:</b> TTCAGGAATGCCTTGAAACC       |
|         | <b>R:</b> TTAGCTTTCCGTCCCACAC        |
| Actin   | <b>F:</b> CTGTTCCAATCTACGAGGGTTTCT   |
|         | <b>R:</b> GCTCGGCTGTGGTGGTGAA        |

23 F: forward primer sequence, R: reverse primer sequence

## 25 Supplementary Table S2. Mass spectrometric data of eight fractions

| RT/min             | Compound Name                                                                                             | Cas         | Area % |
|--------------------|-----------------------------------------------------------------------------------------------------------|-------------|--------|
| <b>Fraction I</b>  |                                                                                                           |             |        |
| 9.64               | Cyclohexasiloxane, dodecamethyl                                                                           | 540-97-6    | 0.45   |
| 18.44              | 5'-Fluoro-2'-hydroxy-4-methylchalcone                                                                     | 498535-04-9 | 0.01   |
| 19.71              | Sulfamethizole                                                                                            | 144-82-1    | 0.11   |
| 20.22              | Glycan Galacto-N-biose                                                                                    | 20972-29-6  | 0.34   |
| 29.22              | Apigenin 7-glucoside                                                                                      | 578-74-5    | 0.01   |
| 30.14              | 20-HETE ethanolamide                                                                                      | 942069-11-6 | 0.03   |
| 35.91              | Stigmasta-4,6,22-trienol                                                                                  | 96737-58-5  | 0.04   |
| 40.39              | Lorazepam                                                                                                 | 846-49-1    | 0.01   |
| 49.08              | 2-Butanol, 3-methylol                                                                                     | 598-75-4    | 0.05   |
| 50.58              | Trandolapril                                                                                              | 87679-37-6  | 0.01   |
| 51.12              | Fluvastatin                                                                                               | 93957-55-2  | 0.01   |
| 58.38              | Arachidonoylglycine                                                                                       | 179113-91-8 | 0.01   |
| 59.07              | N-Acetyl-L-tyrosine                                                                                       | 537-55-3    | 0.01   |
| <b>Fraction II</b> |                                                                                                           |             |        |
| 5.83               | L-Alanine, N-[N-[N-(3-pyridinylmethylene)-L-valyl]-L-isoleucyl]                                           | 37580-32-8  | 0.01   |
| 6.58               | Indican                                                                                                   | 487-60-5    | 0.03   |
| 8.50               | Nifedipine                                                                                                | 21829-25-4  | 0.01   |
| 9.84               | 6-Methoxyluteolin                                                                                         | 520-11-6    | 0.01   |
| 11.10              | Palmitelaidic acid                                                                                        | 10030-73-6  | 8.04   |
| 12.19              | Docosatetraenoyl ethanolamide                                                                             | 150314-35-5 | 0.01   |
| 16.31              | Monolauryl phosphate                                                                                      | 2627-35-2   | 0.16   |
| 20.30              | Cyproterone acetate                                                                                       | 427-51-0    | 0.21   |
| 20.56              | N-[4-(6-Methyl-2-benzothiazolyl)phenyl]-4-nitrobenzenesulfonamide                                         | 339223-67-5 | 0.01   |
| 21.45              | 6H-[1,3]Dioxolo[5,6]benzofuro[3,2-c][1]benzopyran-3-ol, 4-(3,7-dimethyl-2,6-octadienyl)-6a,12a-dihydrocic | 66446-94-4  | 0.01   |
| 22.30              | Tricyclo[3.3.1.1.3,7]decane, 1-(2-chloro-3,5-dinitrophenyl)                                               | 71466-68-7  | 0.01   |
| 22.69              | (+)-Abscisic acid                                                                                         | 21293-29-8  | 0.28   |
| 29.68              | Rosmarinic acid                                                                                           | 20283-92-5  | 0.03   |
| 29.88              | (+)-Abscisic acid                                                                                         | 21293-29-8  | 0.04   |
| 31.14              | N-[Tris(hydroxymethyl)methyl]-3-aminopropanesulfonic acid                                                 | 29915-38-6  | 0.19   |
| 33.46              | Urs-20-en-16-one, 3-hydroxy                                                                               | 42482-69-9  | 0.04   |
| 34.59              | Bestatin                                                                                                  | 58970-76-6  | 0.01   |
| 36.19              | 9-Oxo-prosta-10,12Z,14E-trienoic acid                                                                     | 573951-20-9 | 0.01   |
| 39.42              | 1,2,3,4-Phenazinetetrol, 7-methylol                                                                       | 23774-08-5  | 0.01   |
| 42.65              | R-1 Methanandamide phosphate                                                                              | 649569-33-5 | 0.02   |
| 42.78              | R-1 Methanandamide phosphate                                                                              | 649569-33-5 | 0.01   |
| 43.57              | Fenamifos sulfoxide                                                                                       | 31972-43-7  | 1.36   |
| 44.30              | Pamoic acid                                                                                               | 130-85-8    | 0.01   |
| 44.36              | Benzethonium                                                                                              | 10172-60-8  | 0.01   |
| 48.17              | Fenamifos sulfoxide                                                                                       | 31972-43-7  | 0.01   |
| 49.32              | Oxamflatin                                                                                                | 151720-43-3 | 0.01   |
| 49.59              | s-Triazolo[4,3-a]pyrazine, 3-methyl-5,6-diphenyl                                                          | 33709-78-3  | 0.42   |

|       |                                       |             |      |
|-------|---------------------------------------|-------------|------|
| 52.50 | 9-Oxo-prosta-10,12Z,14E-trienoic acid | 573951-20-9 | 0.01 |
| 53.11 | N-Lauroylsarcosine                    | 97-78-9     | 0.10 |
| 53.45 | Glycerol 1-stearate                   | 123-94-4    | 0.01 |
| 54.39 | Dodecylbenzenesulfonic acid           | 27176-87-0  | 0.01 |
| 54.46 | 9-Oxo-prosta-10,12Z,14E-trienoic acid | 573951-20-9 | 0.01 |
| 57.36 | Trioctylmethylammonium cation         | 22061-11-6  | 0.01 |
| 58.58 | 4-Methylumbelliferyl, D-glucuronide   | 6160-80-1   | 1.02 |
| 59.39 | Indican                               | 487-60-5    | 0.02 |

### Fraction III

|       |                                                                                  |              |      |
|-------|----------------------------------------------------------------------------------|--------------|------|
| 2.19  | Aminopyralid                                                                     | 150114-71-9  | 0.10 |
| 4.03  | Glycan Chitobiose                                                                | 577-76-4     | 0.17 |
| 4.51  | 3-Hydroxy-4'-methoxy-6-methylflavone                                             | 6971-17-1    | 0.01 |
| 5.35  | 1-Hexadecanoyl-sn-glycerol                                                       | 542-44-9     | 0.10 |
| 11.79 | Sorbitan monopalmitate                                                           | 26266-57-9   | 0.03 |
| 13.39 | N-2-Hydroxyethylpiperazine-N-3-propanesulfonic acid                              | 16052-06-5   | 0.22 |
| 13.91 | 2'-Deoxyguanosine 5'-diphosphate                                                 | 3493-09-2    | 0.83 |
| 15.64 | Prostaglandin                                                                    | 551-11-1     | 0.01 |
| 17.22 | Cholest-4-en-26-oic acid, 7-hydroxyoxo                                           | 1246298-65-6 | 0.01 |
| 17.28 | HC Toxin                                                                         | 83209-65-8   | 0.01 |
| 18.65 | Cholest-4-en-26-oic acid, 7-hydroxy-3-oxo                                        | 1246298-65-6 | 0.32 |
| 19.67 | Hydrocortisone 21-acetate                                                        | 50-03-3      | 0.01 |
| 20.40 | 9-Octadecenamide                                                                 | 301-02-0     | 0.59 |
| 21.26 | Olean-12-en-1-one, 3-hydroxy                                                     | 66088-17-3   | 0.09 |
| 22.22 | Tetradecylphosphonate                                                            | 4671-75-4    | 0.68 |
| 22.81 | Cephalothin                                                                      | 153-61-7     | 0.15 |
| 23.20 | Stigmasta-4,6,22-trienol                                                         | 96737-58-5   | 0.02 |
| 24.01 | Cyclohexasiloxane, dodecamethyl                                                  | 540-97-6     | 0.02 |
| 24.94 | Dinor-12-oxophytodienoic Acid                                                    | 197247-23-7  | 0.07 |
| 25.55 | 3,3'-Dihydroxy-5,5'-dimethoxy-7,7'-dimethyl-2,2'-binaphthalene-1,1',4,4'-tetrone | 88381-91-3   | 0.04 |
| 26.88 | Mefloquine                                                                       | 53230-10-7   | 0.01 |
| 27.38 | Naphthalene, 3-methoxy-1-nitro-2-(pentachlorophenyl)                             | 57187-61-8   | 0.77 |
| 27.87 | 4(5)-EpDPE methyl ester                                                          | 121818-29-9  | 0.46 |
| 28.18 | Decanedioic acid, bis(2-ethylhexyl) ester                                        | 122-62-3     | 0.01 |
| 28.25 | N-Arachidonoyltaurine                                                            | 119959-65-8  | 0.01 |
| 30.49 | Diisodecyl phthalate                                                             | 26761-40-0   | 0.07 |
| 30.74 | HC Toxin                                                                         | 83209-65-8   | 0.01 |
| 31.19 | Palmitelaidic acid                                                               | 10030-73-6   | 0.22 |
| 31.38 | Carbaprostacyclin                                                                | 69552-46-1   | 0.04 |
| 31.50 | Aloenin                                                                          | 38412-46-3   | 0.01 |
| 32.38 | Tribenzylamine N-oxide                                                           | 6852-46-6    | 0.09 |
| 32.89 | 13-Docosenamide                                                                  | 112-84-5     | 0.28 |
| 33.74 | 8-iso-Prostaglandin A2                                                           | 474391-66-7  | 0.06 |
| 34.33 | Bezafibrate                                                                      | 41859-67-0   | 1.27 |
| 35.94 | 4,4'-Sulfonylbisphenol                                                           | 80-09-1      | 0.01 |
| 36.47 | Guanosine 5'-diphosphate                                                         | 146-91-8     | 0.79 |

|       |                                                               |              |      |
|-------|---------------------------------------------------------------|--------------|------|
| 40.46 | Lactitol                                                      | 585-86-4     | 0.01 |
| 40.52 | 9-Oxo-prosta-10,12Z,14E-trienoic acid                         | 573951-20-9  | 0.01 |
| 41.03 | Mono-tert-butyl carbonotrithioate                             | 68060-10-6   | 0.13 |
| 41.55 | Adenosine 3',5'-cyclic monophosphate                          | 60-92-4      | 0.02 |
| 41.62 | Dinor-12-oxophytodienoic Acid                                 | 197247-23-7  | 0.01 |
| 42.34 | Dodecylbenzenesulfonic acid                                   | 27176-87-0   | 0.01 |
| 43.06 | 9-Oxo-prosta-10,12Z,14E-trienoic acid                         | 573951-20-9  | 0.01 |
| 44.02 | 17,20,21-Trihydroxypregn-1-ene-3,11-dione                     | 147202-58-2  | 1.17 |
| 46.00 | Picrotoxinin                                                  | 17617-45-7   | 0.01 |
| 47.08 | Cytidine 2',3'-cyclic monophosphoric acid                     | 15718-51-1   | 0.23 |
| 49.09 | 2-Phenylacetamide                                             | 103-81-1     | 0.01 |
| 49.36 | Ampicillin                                                    | 69-53-4      | 0.59 |
| 50.25 | N-Propyl-L-arginine                                           | 137361-05-8  | 0.32 |
| 51.58 | 9-Oxo-prosta-10,12Z,14E-trienoic acid                         | 573951-20-9  | 0.01 |
| 52.52 | 17-Phenyl trinor prostaglandin E2                             | 38315-43-4   | 0.78 |
| 53.12 | 17-Phenyl trinor prostaglandin E2                             | 38315-43-4   | 0.04 |
| 53.40 | 9-Oxo-prosta-10,12Z,14E-trienoic acid                         | 573951-20-9  | 0.03 |
| 53.60 | Isodeoxycholic acid                                           | 566-17-6     | 0.04 |
| 53.87 | Deoxycholic acid                                              | 83-44-3      | 0.05 |
| 54.00 | Prostaglandin E1                                              | 745-65-3     | 0.01 |
| 54.34 | Dodecylbenzenesulfonic acid                                   | 27176-87-0   | 0.12 |
| 54.75 | Thymidine 5'-monophosphate                                    | 365-07-1     | 0.08 |
| 55.23 | 4-Benzyloxy-2',3,4',6'-tetramethoxychalcone                   | 1017900-43-4 | 0.09 |
| 56.18 | Dodecylbenzenesulfonic acid                                   | 27176-87-0   | 0.01 |
| 56.24 | 5S,12R-Dihydroxy-6Z,8E,10E,14Z-eicosatetraene-1,20-dioic acid | 80434-82-8   | 0.01 |
| 56.58 | D-myo-Inositol-1,3,4-triphosphate                             | 93133-76-7   | 0.06 |
| 56.99 | Estradiol 3-(D-glucuronide)                                   | 15270-30-1   | 0.13 |
| 57.33 | Corticosterone                                                | 50-22-6      | 0.01 |
| 57.46 | 2'-Deoxyguanosine 5'-diphosphate                              | 3493-09-2    | 0.02 |
| 58.13 | Quercetin 3,5,7,3',4'-pentamethyl ether                       | 1247-97-8    | 3.68 |
| 58.67 | Olean-12-en-1-one, 3-hydroxy                                  | 66088-17-3   | 0.05 |
| 59.19 | Dodecylbenzenesulfonic acid                                   | 27176-87-0   | 0.19 |
| 59.53 | 9-Deoxy-9-methylene-16,16-dimethyl Prostaglandin E2           | 61263-35-2   | 0.01 |
| 59.94 | 3-Amino-4-hydroxyphenyl sulfone                               | 7545-50-8    | 0.10 |

#### Fraction IV

|       |                                                               |            |      |
|-------|---------------------------------------------------------------|------------|------|
| 7.16  | Neomenthyl diphenylphosphine oxide                            | 43077-30-1 | 0.29 |
| 15.28 | 5-Methoxytryptophan                                           | 28052-84-8 | 0.01 |
| 27.18 | 3-Methoxyprostaglandin                                        | 54432-43-8 | 0.96 |
| 29.08 | Adenosine 3',5'-cyclic monophosphate                          | 60-92-4    | 0.01 |
| 30.87 | Lovastatin hydroxy acid                                       | 75225-51-3 | 0.01 |
| 40.69 | Guanosine 3',5'-cyclic monophosphate                          | 7665-99-8  | 0.01 |
| 43.88 | 5S,12R-Dihydroxy-6Z,8E,10E,14Z-eicosatetraene-1,20-dioic acid | 80434-82-8 | 0.01 |
| 47.69 | 4-(2-Hydroxyethyl)piperazine-1-ethanesulfonic acid            | 7365-45-9  | 0.28 |
| 49.73 | Dodecylbenzenesulfonic acid                                   | 27176-87-0 | 0.01 |
| 50.54 | Thymidine 5'-monophosphate                                    | 365-07-1   | 0.07 |
| 51.97 | 2-(Cyclohexylamino)ethanesulfonic acid                        | 103-47-9   | 0.02 |

|       |                                                                  |             |      |
|-------|------------------------------------------------------------------|-------------|------|
| 52.24 | 2-(Cyclohexylamino)ethanesulfonic acid                           | 103-47-9    | 0.01 |
| 52.58 | Dodecylbenzenesulfonic acid                                      | 27176-87-0  | 0.75 |
| 53.54 | 1-Hexadecanoyl-sn-glycerol                                       | 542-44-9    | 0.01 |
| 54.09 | Inosine 5'-monophosphate                                         | 131-99-7    | 0.09 |
| 54.77 | 2-(Cyclohexylamino)ethanesulfonic acid                           | 103-47-9    | 0.01 |
| 55.16 | 20a,20b-Dihomo-9-oxo-11R,15S-dihydroxy-5Z,13E-prostadienoic acid | 37492-24-3  | 0.13 |
| 55.30 | Prostaglandin                                                    | 551-11-1    | 0.06 |
| 56.83 | Val-Leu                                                          | 3989-97-7   | 2.12 |
| 58.06 | 8-iso-Prostaglandin A2                                           | 474391-66-7 | 0.01 |
| 59.91 | 5S,12R-Dihydroxy-6Z,8E,10E,14Z-eicosatetraene-1,20-dioic acid    | 80434-82-8  | 0.01 |

#### Fraction V

|       |                                                                     |              |       |
|-------|---------------------------------------------------------------------|--------------|-------|
| 4.60  | Enrofloxacin                                                        | 93106-60-6   | 0.01  |
| 6.09  | Pyrazol-5(4H)-one, 4-(2,5-dimethoxybenzylideno)-3-methyl-1-phenylol | 67866-56-2   | 30.28 |
| 6.58  | Oleoyl ethylamide                                                   | 85075-82-7   | 14.35 |
| 7.27  | 9-Borabicyclo[3.3.1]nonane, 9,9'-selenobis                          | 116951-81-6  | 7.04  |
| 7.54  | Clopidogrel                                                         | 113665-84-2  | 2.69  |
| 8.04  | 3',5'-Cyclic Inosine monophosphate                                  | 3545-76-4    | 0.01  |
| 8.49  | Oleoyl ethylamide                                                   | 85075-82-7   | 0.59  |
| 9.63  | Calcipotriol                                                        | 112828-00-9  | 0.01  |
| 10.49 | Cholestanone oxime acetate                                          | 26988-10-3   | 0.01  |
| 10.55 | Dichotine, 2-deoxy-2,21-epoxy                                       | 29474-91-7   | 0.01  |
| 10.68 | 15-Ketobimatoprost                                                  | 1163135-96-3 | 0.01  |
| 11.02 | 7-Hydroxyflavanone                                                  | 6515-36-2    | 0.49  |
| 11.89 | Vomicine                                                            | 125-15-5     | 0.01  |
| 12.30 | Fluvastatin                                                         | 93957-55-2   | 0.03  |
| 13.49 | Neomenthyl diphenylphosphine oxide                                  | 43077-30-1   | 0.92  |
| 14.33 | Aristolochic acid                                                   | 313-67-7     | 1.05  |
| 15.24 | 17-Phenyl trinor prostaglandin cyclopropyl methyl amide             | 1138395-10-4 | 0.01  |
| 17.70 | 3-Hydroxy-2',4,4',6'-tetramethoxychalcone                           | 97080-85-8   | 0.01  |
| 17.84 | Aristolochic acid                                                   | 313-67-7     | 0.01  |
| 17.91 | Fosamax                                                             | 121268-17-5  | 0.01  |
| 19.36 | HC Toxin                                                            | 83209-65-8   | 0.40  |
| 20.03 | Bimatoprost diethylamide                                            | 1176637-26-5 | 0.01  |
| 20.77 | N-[Tris(hydroxymethyl)methyl]-3-amino-2-hydroxypropanesulfonic acid | 68399-81-5   | 0.09  |
| 21.16 | N-Lauroylsarcosine                                                  | 97-78-9      | 0.09  |
| 21.44 | Glycodeoxycholic acid                                               | 360-65-6     | 0.06  |
| 21.97 | Thiamine monophosphate                                              | 495-23-8     | 0.24  |
| 23.05 | Fluvastatin                                                         | 93957-55-2   | 0.01  |
| 23.11 | 4-(4-tert-Butyl-benzylidene)-2-(3-iodo-phenyl)-4H-oxazol-5-one      | 331667-84-6  | 0.01  |
| 23.45 | Arachidonic acid methyl ester                                       | 2566-89-4    | 0.07  |
| 23.73 | 2-Phenyl-4,6-di(4-acetylamino-phenyl)pyrimidine                     | 136009-76-2  | 0.01  |
| 23.80 | Sulfaphenazole                                                      | 526-08-9     | 0.01  |
| 24.07 | 3-Amino-4-hydroxyphenyl sulfone                                     | 7545-50-8    | 0.02  |
| 24.27 | Phytanic acid                                                       | 14721-66-5   | 0.01  |
| 25.34 | N-Desmethylverapamil                                                | 77326-93-3   | 0.01  |
| 26.01 | Cholest-5-enediol                                                   | 17320-10-4   | 0.29  |



|       |                                                                             |              |      |
|-------|-----------------------------------------------------------------------------|--------------|------|
| 26.42 | 3,7,14,18-Tetrathiatricyclo[18.2.2.2(9,12)]hexacos-9,11,20,22,23,25-hexaene | 26822-25-3   | 0.01 |
| 26.83 | Phytanic acid                                                               | 14721-66-5   | 0.01 |
| 26.89 | Thiamine monophosphate                                                      | 495-23-8     | 0.01 |
| 27.63 | Norflloxacin                                                                | 70458-96-7   | 0.01 |
| 27.76 | Isoxathion                                                                  | 18854-01-8   | 0.01 |
| 28.89 | Guanosine 5'-diphosphate                                                    | 146-91-8     | 0.01 |
| 28.96 | Cytidine 5'-diphosphate                                                     | 63-38-7      | 0.01 |
| 29.23 | Adrenosterone                                                               | 382-45-6     | 0.01 |
| 29.30 | Hexylglutathione                                                            | 24425-56-7   | 0.01 |
| 29.96 | Dodecyldimethylphosphine oxide                                              | 871-95-4     | 0.01 |
| 30.10 | Glycerol 1-myristate                                                        | 589-68-4     | 0.01 |
| 30.44 | Stigmasta-4,6,22-trienol                                                    | 96737-58-5   | 0.05 |
| 30.98 | Cytidine 2',3'-cyclic monophosphoric acid                                   | 15718-51-1   | 0.01 |
| 31.31 | Egtazic acid                                                                | 67-42-5      | 0.01 |
| 31.79 | Diisodecyl phthalate                                                        | 26761-40-0   | 0.50 |
| 32.11 | Prosulfuron                                                                 | 94125-34-5   | 0.01 |
| 32.38 | 9-Octadecenamide                                                            | 301-02-0     | 0.06 |
| 34.20 | 2'-Deoxyguanosine 5'-diphosphate                                            | 3493-09-2    | 0.01 |
| 34.33 | 2'-Deoxyguanosine 5'-diphosphate                                            | 3493-09-2    | 0.01 |
| 34.47 | 9-Oxo-prosta-10,12Z,14E-trienoic acid                                       | 573951-20-9  | 0.01 |
| 34.74 | Prostaglandin B2                                                            | 13367-85-6   | 0.46 |
| 35.01 | Flufenamic acid                                                             | 530-78-9     | 0.35 |
| 35.67 | Cholest-4-en-26-oic acid, 7-hydroxy-3-oxo                                   | 1246298-65-6 | 0.01 |
| 35.95 | cis-9-Hexadecenoic acid                                                     | 373-49-9     | 0.08 |
| 36.22 | Estriol                                                                     | 50-27-1      | 0.01 |
| 36.50 | Fluroxypyr                                                                  | 69377-81-7   | 0.07 |
| 37.24 | 2'-Deoxycytidine 5'-diphosphate                                             | 800-73-7     | 0.01 |
| 38.20 | Dinor-12-oxophytodienoic Acid                                               | 197247-23-7  | 0.01 |
| 38.47 | Estriol                                                                     | 50-27-1      | 0.01 |
| 38.53 | D-myo-Inositol-1,2,6-triphosphate                                           | 28841-62-5   | 0.01 |
| 39.47 | Diisooctyl phthalate                                                        | 131-20-4     | 0.01 |
| 39.54 | Uridine 5'-monophosphate                                                    | 58-97-9      | 0.01 |
| 39.80 | Uridine 5'-monophosphate                                                    | 58-97-9      | 0.01 |
| 39.87 | 5-Iodouridine                                                               | 1024-99-3    | 0.01 |
| 39.94 | Salicin                                                                     | 138-52-3     | 0.01 |
| 40.41 | Salicin                                                                     | 138-52-3     | 0.17 |
| 40.75 | Cholic acid                                                                 | 81-25-4      | 0.01 |
| 40.82 | Bestatin                                                                    | 58970-76-6   | 0.01 |
| 40.96 | Prostaglandin B2                                                            | 13367-85-6   | 0.01 |
| 41.71 | Normorphine                                                                 | 466-97-7     | 0.13 |
| 42.46 | Uridine 5'-monophosphate                                                    | 58-97-9      | 0.01 |
| 43.20 | Dodecylbenzenesulfonic acid                                                 | 27176-87-0   | 0.01 |
| 43.40 | Thymidine 3',5'-cyclic monophosphate                                        | 6453-60-7    | 0.01 |
| 44.14 | Dodecylbenzenesulfonic acid                                                 | 27176-87-0   | 0.11 |
| 45.97 | Flufenamic acid                                                             | 530-78-9     | 0.01 |

|       |                                       |             |      |
|-------|---------------------------------------|-------------|------|
| 46.18 | 4-Androsten-17-olone sulfate          | 651-45-6    | 0.05 |
| 46.44 | 9-Octadecenamide                      | 301-02-0    | 0.02 |
| 46.72 | 5-Iodouridine                         | 1024-99-3   | 0.01 |
| 46.79 | Dodecylbenzenesulfonic acid           | 27176-87-0  | 0.01 |
| 49.19 | 5-Iodouridine                         | 1024-99-3   | 0.01 |
| 49.87 | 9-Octadecenamide                      | 301-02-0    | 0.01 |
| 49.94 | Dodecylbenzenesulfonic acid           | 27176-87-0  | 0.01 |
| 50.01 | Dodecylbenzenesulfonic acid           | 27176-87-0  | 0.01 |
| 50.21 | Thymidine 3',5'-cyclic monophosphate  | 6453-60-7   | 0.09 |
| 50.49 | Cyclophosphamide                      | 50-18-0     | 0.03 |
| 50.69 | Dexamethasone                         | 50-02-2     | 0.01 |
| 50.82 | 5-Iodouridine                         | 1024-99-3   | 0.01 |
| 51.51 | Neomenthylidiphenylphosphine oxide    | 43077-30-1  | 0.20 |
| 52.11 | Dodecylbenzenesulfonic acid           | 27176-87-0  | 0.02 |
| 52.38 | Benzethonium                          | 10172-60-8  | 0.01 |
| 52.44 | Dodecylbenzenesulfonic acid           | 27176-87-0  | 0.01 |
| 52.57 | N6-(4-Methoxybenzoyl)adenosine        | 56883-05-7  | 0.01 |
| 54.13 | Metolazone                            | 17560-51-9  | 0.09 |
| 55.56 | Monolauryl phosphate                  | 2627-35-2   | 0.01 |
| 55.63 | Dodecylbenzenesulfonic acid           | 27176-87-0  | 0.01 |
| 56.11 | D-myo-Inositol-1,4-diphosphate        | 74465-19-3  | 0.02 |
| 56.25 | Cytidine 5'-monophosphate             | 63-37-6     | 0.02 |
| 56.59 | 9-Oxo-prosta-10,12Z,14E-trienoic acid | 573951-20-9 | 0.01 |
| 56.66 | Dodecylbenzenesulfonic acid           | 27176-87-0  | 0.01 |
| 56.73 | Phlorizin                             | 60-81-1     | 0.01 |
| 57.20 | 3',5'-Cyclic Inosine monophosphate    | 3545-76-4   | 0.04 |
| 58.16 | N-Acetyl-D-lactosamine                | 32181-59-2  | 0.01 |
| 58.30 | Prostaglandin B1                      | 13345-51-2  | 0.01 |
| 58.37 | N-Acetylglucosaminylasparagine        | 2776-93-4   | 0.01 |
| 59.82 | 1,4-Piperazinediethanesulfonic acid   | 5625-37-6   | 0.01 |

#### Fraction VI

|       |                                                                |             |      |
|-------|----------------------------------------------------------------|-------------|------|
| 4.15  | Propaquizafop                                                  | 111479-05-1 | 0.13 |
| 6.16  | Glycan N-Acetyllactosamine                                     | 32181-59-2  | 0.06 |
| 7.28  | Kenpallone                                                     | 142273-20-9 | 4.20 |
| 11.21 | 2,3,3',4,5-Pentachloro-1,1'-biphenyl                           | 70424-69-0  | 0.01 |
| 14.09 | D-Mannitol 1-phosphate                                         | 15806-48-1  | 0.42 |
| 14.27 | Cobalt,bis[(1,2,3,4,5,6-1-phenylboratabenzene]                 | 36534-31-3  | 0.19 |
| 16.07 | 3-[N,N-Bis(2-hydroxyethyl)amino]-2-hydroxypropanesulfonic acid | 68399-80-4  | 0.30 |
| 19.60 | Isoconazole                                                    | 27523-40-6  | 0.10 |
| 21.01 | 20-Hydroxy-(5Z,8Z,11Z,14Z)-eicosatetraenoic acid               | 79551-86-3  | 0.03 |
| 22.02 | 2,4-Di-tert-butyl-6-(5-chloro-2H-benzotriazol-2-yl)phenol      | 3864-99-1   | 0.01 |
| 22.30 | 3'-Hydroxy-D-sepiapterin                                       | 41230-32-4  | 0.39 |
| 23.24 | Butorphanol                                                    | 42408-82-2  | 0.05 |
| 30.60 | Neomenthylidiphenylphosphine oxide                             | 43077-30-1  | 0.01 |
| 31.00 | Neomenthylidiphenylphosphine oxide                             | 43077-30-1  | 0.01 |
| 31.07 | Dodecyl dimethylphosphine oxide                                | 871-95-4    | 0.01 |

|       |                                                        |            |      |
|-------|--------------------------------------------------------|------------|------|
| 32.56 | D-Glucose 6-phosphate                                  | 56-73-5    | 0.01 |
| 34.59 | Melibiose                                              | 585-99-9   | 0.01 |
| 34.66 | Tioconazole                                            | 65899-73-2 | 0.01 |
| 36.30 | Aldosterone                                            | 52-39-1    | 0.02 |
| 36.71 | Dodecylbenzenesulfonic acid                            | 27176-87-0 | 0.01 |
| 38.06 | Glycerol 1-myristate                                   | 589-68-4   | 0.01 |
| 40.23 | N-Lauroylsarcosine                                     | 97-78-9    | 0.01 |
| 41.12 | Melibiose                                              | 585-99-9   | 0.01 |
| 42.15 | Neomenthyl diphenylphosphine oxide                     | 43077-30-1 | 0.01 |
| 43.16 | Flurandrenolide                                        | 1524-88-5  | 0.01 |
| 44.17 | Methaqualone                                           | 72-44-6    | 0.01 |
| 45.05 | N6-(4-Methoxybenzoyl)adenosine                         | 56883-05-7 | 0.01 |
| 45.40 | Dodecylbenzenesulfonic acid                            | 27176-87-0 | 0.14 |
| 47.16 | Thymidine 3',5'-cyclic monophosphate                   | 6453-60-7  | 0.01 |
| 49.83 | Epitestosterone                                        | 481-30-1   | 0.03 |
| 51.40 | Cholic acid                                            | 81-25-4    | 0.01 |
| 51.88 | Dodecylbenzenesulfonic acid                            | 27176-87-0 | 0.03 |
| 52.43 | N-Tris(hydroxymethyl)methyl-4-aminobutanesulfonic acid | 54960-65-5 | 0.01 |
| 52.98 | Butanoic acid, heptafluoro, lithium salt               | 4146-76-3  | 0.01 |
| 53.40 | 5-Iodouridine                                          | 1024-99-3  | 0.01 |
| 55.24 | Metolazone                                             | 17560-51-9 | 0.01 |
| 55.99 | Xanthosine                                             | 146-80-5   | 0.01 |
| 56.20 | Dodecylbenzenesulfonic acid                            | 27176-87-0 | 0.01 |
| 59.61 | Monolauryl phosphate                                   | 2627-35-2  | 0.01 |

#### Fraction VII

|       |                                                                     |             |      |
|-------|---------------------------------------------------------------------|-------------|------|
| 0.77  | 4-Amino-6-[[3,4-dichlorophenyl]sulfonyl]quinazoline                 | 52979-19-8  | 0.01 |
| 4.48  | Thioridazine                                                        | 50-52-2     | 0.01 |
| 4.93  | Tebufenozide                                                        | 112410-23-8 | 0.06 |
| 6.27  | S-Methyl-L-thiocitrulline                                           | 209589-59-3 | 0.02 |
| 6.34  | 1,3,5(10)-Estratriendiol 17-glucosiduronate                         | 1806-98-0   | 0.01 |
| 9.19  | Fipronil                                                            | 120068-37-3 | 2.59 |
| 11.36 | 16,16-Dimethylprostaglandin E2                                      | 39746-25-3  | 0.01 |
| 11.69 | D-myo-Inositol-1,2-diphosphate                                      | 208584-51-4 | 0.16 |
| 15.82 | Quercetin 3,5,7,3',4'-pentamethyl ether                             | 1247-97-8   | 0.01 |
| 16.75 | Niflumic acid                                                       | 4394-00-7   | 2.76 |
| 20.19 | 9-Oxo-prosta-10,12Z,14E-trienoic acid                               | 573951-20-9 | 0.12 |
| 21.48 | Glycoursodeoxycholic acid                                           | 64480-66-6  | 0.18 |
| 22.77 | Cholic acid                                                         | 81-25-4     | 0.01 |
| 23.45 | Tetradecylphosphonate                                               | 4671-75-4   | 0.54 |
| 26.16 | Fosamax                                                             | 121268-17-5 | 0.11 |
| 28.27 | Calcitriol                                                          | 32222-06-3  | 0.01 |
| 28.41 | Cholesta-5,8(9)-dienol                                              | 70741-38-7  | 0.01 |
| 29.49 | Decanedioic acid, bis(2-ethylhexyl) ester                           | 122-62-3    | 0.02 |
| 30.04 | Uridine 5'-monophosphate                                            | 58-97-9     | 0.10 |
| 30.57 | Roquefortine                                                        | 58735-64-1  | 0.30 |
| 30.84 | N-[Tris(hydroxymethyl)methyl]-3-amino-2-hydroxypropanesulfonic acid | 68399-81-5  | 0.01 |

|       |                                                            |             |      |
|-------|------------------------------------------------------------|-------------|------|
| 31.39 | 6-Phosphogluconic acid                                     | 921-62-0    | 0.19 |
| 31.52 | Pentasiloxane, dodecamethyl                                | 141-63-9    | 0.35 |
| 31.78 | Pentasiloxane, dodecamethyl                                | 141-63-9    | 0.22 |
| 32.19 | Uridine 5'-monophosphate                                   | 58-97-9     | 0.01 |
| 33.06 | Normorphine                                                | 466-97-7    | 0.04 |
| 33.40 | Pregn-16-en-20-one, 3,18-bis(acetyloxy)-14,15-epoxy        | 30344-58-2  | 0.05 |
| 35.89 | Decanedioic acid, bis(2-ethylhexyl) ester                  | 122-62-3    | 0.01 |
| 36.28 | 19(20)-EpDPE                                               | 155073-47-5 | 0.01 |
| 36.82 | 5a,6-Anhydrotetracycline                                   | 1665-56-1   | 1.83 |
| 37.28 | Apigenin 7-glucoside                                       | 578-74-5    | 0.01 |
| 37.35 | Abrine                                                     | 526-31-8    | 0.02 |
| 37.96 | Limaprost                                                  | 74397-12-9  | 0.01 |
| 39.18 | Dodecylbenzenesulfonic acid                                | 27176-87-0  | 0.06 |
| 39.59 | Urs-20-enone                                               | 66965-53-5  | 0.07 |
| 40.07 | Lactulose                                                  | 4618-18-2   | 0.01 |
| 40.56 | 3,2'-Dihydroxychalcone                                     | 36574-83-1  | 0.84 |
| 41.02 | D-Glucosamine 1-phosphate                                  | 2152-75-2   | 0.01 |
| 42.39 | Dodecylbenzenesulfonic acid                                | 27176-87-0  | 0.17 |
| 42.73 | Dinor-12-oxophytodienoic Acid                              | 197247-23-7 | 0.01 |
| 43.13 | Dinor-12-oxophytodienoic Acid                              | 197247-23-7 | 0.48 |
| 43.47 | Hexylglutathione                                           | 24425-56-7  | 0.01 |
| 44.28 | Mebeverine                                                 | 3625-06-7   | 0.01 |
| 44.68 | Dodecylbenzenesulfonic acid                                | 27176-87-0  | 0.01 |
| 44.74 | N-Arachidonoyltaurine                                      | 119959-65-8 | 0.01 |
| 45.07 | Ethanediamide, N-(1-methylpropyl)-N'-(3-pyridinylmethyl)   | 339241-94-0 | 1.63 |
| 45.68 | Octadecanamide                                             | 124-26-5    | 0.02 |
| 45.82 | Cytidine 2',3'-cyclic monophosphoric acid                  | 15718-51-1  | 0.01 |
| 46.29 | Geranyl pyrophosphate                                      | 763-10-0    | 0.56 |
| 46.69 | Dodecylbenzenesulfonic acid                                | 27176-87-0  | 0.01 |
| 47.65 | Palmitamide                                                | 629-54-9    | 0.41 |
| 48.12 | Estriol                                                    | 50-27-1     | 0.03 |
| 49.01 | 5-Iodouridine                                              | 1024-99-3   | 0.01 |
| 49.08 | Bestatin                                                   | 58970-76-6  | 0.01 |
| 49.28 | Glycerol 1-myristate                                       | 589-68-4    | 0.02 |
| 50.85 | N-[Tris(hydroxymethyl)methyl]-3-aminopropanesulfonic acid  | 29915-38-6  | 0.01 |
| 50.92 | 5-Iodo-2'-deoxyuridine                                     | 54-42-2     | 0.01 |
| 51.46 | Cystine, N,N'-dicarboxy, N-N'-diethyl dimethyl ester       | 21026-91-5  | 0.01 |
| 51.87 | 5-Iodouridine                                              | 1024-99-3   | 0.07 |
| 52.96 | 5-Iodouridine                                              | 1024-99-3   | 0.03 |
| 53.65 | 5-Iodouridine                                              | 1024-99-3   | 0.01 |
| 54.27 | 2'-Deoxycytidine 5'-diphosphate                            | 800-73-7    | 1.37 |
| 55.22 | Polythiazide                                               | 346-18-9    | 0.11 |
| 55.50 | Capsaicin                                                  | 404-86-4    | 0.01 |
| 55.77 | Estriol                                                    | 50-27-1     | 0.01 |
| 56.26 | Prostaglandin D1                                           | 17968-82-0  | 0.10 |
| 56.81 | (4-Methyl-1-naphthalenyl)(1-pentyl-1H-indol-3-yl)methanone | 619294-47-2 | 0.01 |

|       |                                       |            |      |
|-------|---------------------------------------|------------|------|
| 57.15 | Thromboxane B2                        | 54397-85-2 | 0.02 |
| 57.97 | 16,16-Dimethyl-6-ketoprostaglandin E1 | 75874-32-7 | 0.03 |
| 58.18 | Jatrorrhizine cation                  | 3621-38-3  | 0.03 |
| 58.38 | (+)-Abscisic acid                     | 21293-29-8 | 0.01 |
| 58.59 | Dodecylbenzenesulfonic acid           | 27176-87-0 | 0.01 |

#### Fraction VIII

|       |                                                                                     |             |      |
|-------|-------------------------------------------------------------------------------------|-------------|------|
| 22.02 | 5H,13H-Dibenzo[c,h]dipyrrolonaphthyridine, 6,7,7a,8,14,15-hexahydro-7,15-dimethylol | 16739-54-1  | 0.07 |
| 40.26 | Uridine 5'-monophosphate                                                            | 58-97-9     | 0.11 |
| 40.48 | Guanosine 3',5'-cyclic monophosphate                                                | 7665-99-8   | 0.03 |
| 47.86 | Enterodiol                                                                          | 80226-00-2  | 0.02 |
| 50.01 | N-(3-Furanylmethyl)-5Z,8Z,11Z,14Z-eicosatetraenamide                                | 390824-20-1 | 0.02 |
| 50.50 | N-(3-Furanylmethyl)-5Z,8Z,11Z,14Z-eicosatetraenamide                                | 390824-20-1 | 0.02 |
| 51.06 | Picrotoxinin                                                                        | 17617-45-7  | 0.02 |
| 54.26 | Inosine 5'-diphosphate                                                              | 42599-71-3  | 0.01 |

28 Supplementary Table S3. Differentially abundant proteins in broccoli sprouts under different  
 29 treatments

| Accession No.                  | Description                                                                                | Zn/CK | MT/CK | ZM/Zn | ZM/MT | Co ve | MW (kDa) | TPId | Em PAI | Unique Peptides |
|--------------------------------|--------------------------------------------------------------------------------------------|-------|-------|-------|-------|-------|----------|------|--------|-----------------|
| <b>Carbohydrate metabolism</b> |                                                                                            |       |       |       |       |       |          |      |        |                 |
| A0A178UKL7                     | Malate synthase                                                                            | 1.13  | 2.06  | 0.83  | 0.45  | 53    | 63.846   | 7.94 | 3.15   | 13              |
| A0A178UQL8                     | 6-phosphogluconate dehydrogenase, decarboxylating                                          | 1.08  | 2.15  | 0.97  | 0.49  | 5     | 53.284   | 5.8  | 0.43   | 2               |
| A0A178UTP2                     | L-lactate dehydrogenase                                                                    | 1.31  | 0.81  | 1.09  | 1.77  | 2     | 37.927   | 6.55 | 0.26   | 2               |
| A0A178UUU3                     | Glucose-6-phosphate isomerase                                                              | 1.07  | 0.71  | 1.28  | 1.93  | 2     | 67.006   | 5.69 | 0.11   | 2               |
| A0A178V5M8                     | Phosphoglycerate kinase                                                                    | 1.21  | 0.80  | 1.17  | 1.76  | 30    | 50.081   | 6.24 | 1.37   | 5               |
| A0A178VCV2                     | APS1                                                                                       | 1.58  | 1.36  | 0.70  | 0.80  | 6     | 51.427   | 6.81 | 0.59   | 2               |
| A0A178VRF6                     | Succinate dehydrogenase [ubiquinone] flavoprotein subunit, mitochondrial                   | 1.11  | 1.25  | 0.74  | 0.66  | 9     | 69.319   | 6.27 | 0.44   | 4               |
| A0A178VYB0                     | IDH2                                                                                       | 1.15  | 0.71  | 1.17  | 1.90  | 4     | 39.124   | 6.33 | 0.78   | 1               |
| A0A178W4Q1                     | Phosphoglycerate kinase                                                                    | 0.93  | 1.45  | 0.87  | 0.56  | 21    | 49.908   | 8.27 | 0.75   | 3               |
| A0A178W4Q5                     | Glyceraldehyde-3-phosphate dehydrogenase                                                   | 1.25  | 0.80  | 1.14  | 1.79  | 89    | 36.89    | 7.18 | 9.00   | 10              |
| A0A178W6P8                     | Pyruvate kinase                                                                            | 0.93  | 0.69  | 1.37  | 1.84  | 2     | 62.575   | 7.81 | 0.14   | 2               |
| A0A178W7K0                     | Isocitrate dehydrogenase [NADP]                                                            | 0.96  | 0.77  | 1.44  | 1.79  | 12    | 45.717   | 6.57 | 1.33   | 8               |
| A0A1I9LQM9                     | Mannose-binding lectin superfamily protein                                                 | 1.89  | 1.40  | 0.68  | 0.92  | 1     | 31.964   | 5.55 | 0.18   | 1               |
| A0A1I9LSJ5                     | Citrate synthase                                                                           | 2.04  | 1.74  | 0.70  | 0.82  | 2     | 46.811   | 6.29 | 0.25   | 1               |
| A0A1I9LSJ6                     | Citrate synthase                                                                           | 2.04  | 1.74  | 0.68  | 0.80  | 4     | 52.374   | 6.67 | 0.45   | 1               |
| A0A1I9LT02                     | UDP-GLUCOSE PYROPHOSPHORYLASE 1                                                            | 1.23  | 0.70  | 1.19  | 2.09  | 18    | 52.822   | 6.24 | 0.81   | 6               |
| A0A1I9LT03                     | UDP-GLUCOSE PYROPHOSPHORYLASE 1                                                            | 1.23  | 0.70  | 1.19  | 2.09  | 18    | 51.084   | 6.48 | 0.84   | 6               |
| A0A1P8BC93                     | UDP-glucose pyrophosphorylase 2                                                            | 1.24  | 0.69  | 1.09  | 1.96  | 21    | 37.212   | 7.05 | 1.51   | 6               |
| A0A1P8BC98                     | UDP-glucose pyrophosphorylase 2                                                            | 1.26  | 0.70  | 1.06  | 1.90  | 22    | 42.871   | 6.46 | 1.56   | 7               |
| A0A1P8BDT8                     | Phosphoenolpyruvate carboxykinase 2                                                        | 0.74  | 1.16  | 1.61  | 1.03  | 18    | 76.513   | 6.54 | 0.46   | 1               |
| A0A1P8BDX2                     | Phosphoenolpyruvate carboxykinase 2                                                        | 0.87  | 1.16  | 1.61  | 1.20  | 18    | 62.857   | 6.95 | 0.59   | 1               |
| A0A1P8BFU4                     | Succinate dehydrogenase [ubiquinone] iron-sulfur subunit, mitochondrial                    | 1.99  | 0.90  | 0.69  | 1.54  | 4     | 24.623   | 8.62 | 0.54   | 2               |
| A0A1P8BG38                     | Glucose-6-phosphate isomerase                                                              | 0.90  | 1.18  | 1.56  | 1.18  | 3     | 58.073   | 6.67 | 0.23   | 2               |
| A0A3N7HIG7                     | Nitrilase/cyanide hydratase and apolipoprotein N-acyltransferase family protein (Fragment) | 1.13  | 1.57  | 0.84  | 0.70  | 12    | 19.441   | 5.66 | 1.15   | 2               |
| B3H5Y0                         | Aconitate hydratase                                                                        | 1.31  | 0.71  | 0.97  | 1.79  | 42    | 86.491   | 6.61 | 2.25   | 9               |
| B5X574                         | At5g65690                                                                                  | 0.86  | 1.16  | 1.62  | 1.21  | 18    | 72.845   | 6.42 | 0.48   | 1               |
| B9DFU6                         | AT3G08590 protein                                                                          | 1.17  | 0.72  | 1.08  | 1.75  | 10    | 60.726   | 5.85 | 0.67   | 7               |
| B9DHM5                         | Pyruvate, phosphate dikinase                                                               | 1.92  | 1.35  | 0.73  | 1.03  | 15    | 95.332   | 5.52 | 0.70   | 7               |
| F4I3L1                         | Phosphoglycerate kinase                                                                    | 1.26  | 0.71  | 1.17  | 2.07  | 21    | 42.589   | 5.54 | 0.98   | 3               |
| F4IA73                         | Glutathione S-transferase U21                                                              | 1.76  | 1.15  | 0.77  | 1.19  | 3     | 25.629   | 5.5  | 0.36   | 1               |
| F4IGL5                         | Fructose-bisphosphate aldolase                                                             | 0.97  | 0.75  | 1.39  | 1.80  | 18    | 41.781   | 6.28 | 2.51   | 2               |
| F4IGL7                         | Fructose-bisphosphate aldolase                                                             | 0.97  | 0.73  | 1.25  | 1.66  | 13    | 33.302   | 6.8  | 2.16   | 2               |

|        |                                                                                                            |      |      |      |      |    |        |      |      |    |
|--------|------------------------------------------------------------------------------------------------------------|------|------|------|------|----|--------|------|------|----|
| F4IW47 | Transketolase-2, chloroplastic                                                                             | 0.90 | 1.38 | 1.55 | 1.02 | 5  | 79.872 | 6.58 | 0.26 | 3  |
| F4J0U9 | Dicarboxylate diiron protein, putative (Crd1)                                                              | 1.96 | 1.18 | 0.71 | 1.17 | 1  | 39.154 | 6.44 | 0.11 | 1  |
| F4K7T6 | 1-deoxy-D-xylulose 5-phosphate reductoisomerase                                                            | 1.17 | 0.91 | 1.24 | 1.59 | 1  | 54.194 | 7.25 | 0.07 | 1  |
| F4KC24 | Xylose isomerase                                                                                           | 1.83 | 1.44 | 0.74 | 0.94 | 8  | 32.387 | 7.75 | 1.34 | 6  |
| F4KEX3 | Malate dehydrogenase                                                                                       | 1.23 | 0.75 | 1.07 | 1.76 | 6  | 36.368 | 5.07 | 0.47 | 4  |
| F4KGY8 | UDP-glucose pyrophosphorylase 2                                                                            | 1.23 | 0.82 | 1.05 | 1.57 | 22 | 43.722 | 7.84 | 1.40 | 7  |
| O04499 | 2,3-bisphosphoglycerate-independent phosphoglycerate mutase 1                                              | 1.83 | 0.81 | 0.76 | 1.71 | 5  | 60.542 | 5.53 | 0.30 | 3  |
| O64530 | Thiosulfate/3-mercaptopyruvate sulfurtransferase 1, mitochondrial                                          | 1.83 | 1.14 | 0.73 | 1.18 | 3  | 41.867 | 6.39 | 0.29 | 3  |
| O64688 | Pyruvate dehydrogenase E1 component subunit beta-3, chloroplastic                                          | 1.14 | 1.47 | 0.75 | 0.59 | 1  | 43.987 | 5.8  | 0.15 | 1  |
| O65595 | Probable pyruvate kinase, cytosolic isozyme                                                                | 0.99 | 0.87 | 1.46 | 1.67 | 1  | 54.284 | 7.9  | 0.07 | 1  |
| O80476 | Methylesterase 2                                                                                           | 1.72 | 1.90 | 0.76 | 0.69 | 4  | 29.647 | 5.34 | 0.36 | 1  |
| P25851 | Fructose-1,6-bisphosphatase 1, chloroplastic                                                               | 0.83 | 1.01 | 1.56 | 1.28 | 6  | 45.134 | 5.4  | 0.87 | 4  |
| P25856 | Glyceraldehyde-3-phosphate dehydrogenase GAPA1, chloroplastic                                              | 1.24 | 1.59 | 0.95 | 0.74 | 22 | 42.463 | 7.75 | 2.46 | 7  |
| P25858 | Glyceraldehyde-3-phosphate dehydrogenase GAPC1, cytosolic                                                  | 1.21 | 0.77 | 1.15 | 1.81 | 89 | 36.891 | 7.12 | 9.00 | 10 |
| P34795 | Glucose-6-phosphate isomerase, cytosolic                                                                   | 0.76 | 1.18 | 1.57 | 1.01 | 3  | 61.679 | 6.65 | 0.22 | 2  |
| P56773 | Cytochrome b6                                                                                              | 0.72 | 1.10 | 1.81 | 1.18 | 1  | 24.137 | 8.76 | 0.29 | 1  |
| P93032 | Isocitrate dehydrogenase [NAD] regulatory subunit 2, mitochondrial                                         | 1.03 | 0.72 | 1.33 | 1.90 | 4  | 39.565 | 6.55 | 0.78 | 1  |
| Q07098 | Serine/threonine-protein phosphatase PP2A-2 catalytic subunit                                              | 1.04 | 1.45 | 2.32 | 1.37 | 1  | 34.912 | 4.89 | 0.13 | 1  |
| Q0WUS4 | Malate dehydrogenase                                                                                       | 1.32 | 0.69 | 0.87 | 1.67 | 14 | 37.442 | 7.96 | 0.93 | 4  |
| Q24JL3 | Thiosulfate/3-mercaptopyruvate sulfurtransferase 2                                                         | 1.86 | 1.35 | 0.72 | 0.99 | 1  | 37.389 | 6.13 | 0.11 | 1  |
| Q38799 | Pyruvate dehydrogenase E1 component subunit beta-1, mitochondrial                                          | 1.21 | 0.82 | 0.98 | 1.44 | 10 | 39.151 | 5.83 | 1.45 | 6  |
| Q8H1E2 | Malate dehydrogenase [NADP], chloroplastic                                                                 | 1.21 | 0.89 | 1.20 | 1.63 | 6  | 48.286 | 6.16 | 0.35 | 4  |
| Q8L7W8 | FUC95A                                                                                                     | 0.76 | 1.29 | 1.83 | 1.09 | 1  | 93.628 | 7.12 | 0.05 | 1  |
| Q8LPJ5 | Isocitrate dehydrogenase [NADP], chloroplastic/mitochondrial                                               | 0.85 | 1.47 | 1.07 | 0.62 | 3  | 54.162 | 7.97 | 0.23 | 1  |
| Q8RWN9 | Dihydrolipoyllysine-residue acetyltransferase component 2 of pyruvate dehydrogenase complex, mitochondrial | 1.37 | 0.76 | 1.00 | 1.80 | 3  | 58.431 | 7.65 | 0.15 | 2  |
| Q945K7 | Isocitrate dehydrogenase [NAD] catalytic subunit 5, mitochondrial                                          | 1.17 | 0.81 | 1.09 | 1.57 | 2  | 40.599 | 6.79 | 0.26 | 2  |
| Q94B35 | 4-hydroxy-3-methylbut-2-enyl diphosphate reductase, chloroplastic                                          | 1.17 | 1.46 | 0.74 | 0.59 | 3  | 52.748 | 6.07 | 0.22 | 3  |

|                              |                                                                                                            |      |      |      |      |    |         |      |       |    |
|------------------------------|------------------------------------------------------------------------------------------------------------|------|------|------|------|----|---------|------|-------|----|
| Q9C6Z3                       | Pyruvate dehydrogenase E1 component subunit beta-2, chloroplastic                                          | 1.38 | 0.91 | 1.07 | 1.62 | 1  | 44.216  | 6.35 | 0.15  | 1  |
| Q9C8T3                       | Ribulose-phosphate 3-epimerase                                                                             | 2.02 | 1.20 | 0.67 | 1.13 | 1  | 24.095  | 6.1  | 0.33  | 1  |
| Q9C9C4                       | Enolase 1, chloroplastic                                                                                   | 0.84 | 0.94 | 2.56 | 2.29 | 1  | 51.442  | 6.13 | 0.08  | 1  |
| Q9FKW6                       | Ferredoxin--NADP reductase, leaf isozyme 1, chloroplastic                                                  | 0.87 | 1.33 | 1.61 | 1.06 | 3  | 40.301  | 8.13 | 0.27  | 3  |
| Q9FM97                       | Pyruvate kinase                                                                                            | 0.97 | 0.76 | 1.36 | 1.74 | 1  | 54.376  | 6.86 | 0.07  | 1  |
| Q9FNN1                       | Pyruvate kinase                                                                                            | 0.68 | 1.34 | 2.15 | 1.09 | 1  | 54.941  | 6.29 | 0.07  | 1  |
| Q9LF98                       | Fructose-bisphosphate aldolase 8, cytosolic                                                                | 1.12 | 0.76 | 1.21 | 1.78 | 34 | 38.516  | 6.46 | 8.01  | 7  |
| Q9LIF9                       | Beta-glucosidase 19                                                                                        | 2.53 | 1.45 | 1.28 | 1.38 | 1  | 59.977  | 6.65 | 0.08  | 1  |
| Q9LRS0                       | (S)-2-hydroxy-acid oxidase GLO2                                                                            | 1.15 | 2.66 | 0.91 | 0.40 | 18 | 40.281  | 8.97 | 2.31  | 3  |
| Q9LU95                       | Pyruvate kinase                                                                                            | 1.05 | 0.79 | 1.38 | 1.84 | 1  | 53.741  | 7.39 | 0.07  | 1  |
| Q9LXS7                       | Citrate synthase 1, peroxisomal                                                                            | 1.06 | 1.21 | 2.21 | 1.93 | 3  | 52.862  | 7.96 | 0.25  | 1  |
| Q9LZC3                       | Malate synthase (Fragment)                                                                                 | 1.14 | 1.72 | 0.83 | 0.75 | 30 | 36.438  | 7.28 | 2.36  | 7  |
| Q9M057                       | Pyruvate kinase                                                                                            | 0.98 | 0.90 | 1.48 | 1.61 | 1  | 54.946  | 6.09 | 0.08  | 1  |
| Q9M1D3                       | Citrate synthase 5, mitochondrial                                                                          | 1.90 | 1.73 | 0.70 | 0.77 | 4  | 51.692  | 6.67 | 0.47  | 1  |
| Q9MAH0                       | Phosphoenolpyruvate carboxylase 1                                                                          | 0.86 | 1.39 | 1.62 | 1.00 | 7  | 110.217 | 6.06 | 0.27  | 5  |
| Q9S726                       | Probable ribose-5-phosphate isomerase 3, chloroplastic                                                     | 0.80 | 1.17 | 1.76 | 1.19 | 2  | 29.287  | 6.02 | 0.12  | 1  |
| Q9SHE8                       | Photosystem I reaction center subunit III, chloroplastic                                                   | 1.08 | 1.76 | 0.98 | 0.71 | 6  | 24.158  | 9.54 | 0.93  | 2  |
| Q9SIB9                       | Aconitate hydratase 3, mitochondrial                                                                       | 1.29 | 0.90 | 1.13 | 1.62 | 83 | 108.133 | 7.17 | 3.77  | 15 |
| Q9SJH7                       | Citrate synthase 3, peroxisomal                                                                            | 1.39 | 0.87 | 0.99 | 1.57 | 9  | 56.14   | 7.66 | 0.93  | 3  |
| Q9SJU4                       | Fructose-bisphosphate aldolase 1, chloroplastic                                                            | 1.09 | 0.70 | 1.06 | 1.64 | 19 | 42.904  | 6.58 | 2.68  | 2  |
| Q9SN86                       | Malate dehydrogenase, chloroplastic                                                                        | 1.23 | 0.77 | 0.95 | 1.52 | 12 | 42.379  | 8.51 | 0.98  | 5  |
| Q9SQI8                       | Dihydrolipoyllysine-residue acetyltransferase component 4 of pyruvate dehydrogenase complex, chloroplastic | 1.07 | 0.72 | 1.11 | 1.65 | 4  | 50.049  | 8.37 | 0.45  | 1  |
| Q9SQQ7                       | Pyruvate kinase                                                                                            | 0.97 | 0.80 | 1.31 | 1.59 | 1  | 55.255  | 5.99 | 0.07  | 1  |
| Q9SUI4                       | Photosystem I reaction center subunit XI, chloroplastic                                                    | 0.92 | 1.92 | 0.81 | 0.70 | 1  | 23.037  | 9.85 | 0.23  | 1  |
| Q9XF87                       | Chlorophyll a-b binding protein 2.4, chloroplastic                                                         | 0.77 | 1.27 | 1.56 | 0.94 | 9  | 28.784  | 5.9  | 1.85  | 1  |
| Q9XF88                       | Chlorophyll a-b binding protein CP29.2, chloroplastic                                                      | 0.84 | 2.09 | 1.60 | 0.71 | 7  | 31.174  | 6.24 | 0.31  | 0  |
| Q9XFS9                       | 1-deoxy-D-xylulose 5-phosphate reductoisomerase, chloroplastic                                             | 1.01 | 1.45 | 0.80 | 0.56 | 1  | 51.931  | 7.05 | 0.08  | 1  |
| R0ILH3                       | Glyceraldehyde 3-phosphate dehydrogenase A (Fragment)                                                      | 1.24 | 1.69 | 0.98 | 0.72 | 10 | 8.168   | 4.25 | 16.78 | 3  |
| <b>Amino acid metabolism</b> |                                                                                                            |      |      |      |      |    |         |      |       |    |
| A0A178UKY4                   | Aspartate aminotransferase                                                                                 | 1.27 | 0.76 | 1.14 | 1.91 | 11 | 48.923  | 9.29 | 1.21  | 4  |
| A0A178VQX6                   | Phenylalanine ammonia-lyase                                                                                | 0.81 | 1.06 | 1.61 | 1.23 | 1  | 78.676  | 6.3  | 0.06  | 1  |
| A0A178VQZ7                   | S-formylglutathione hydrolase                                                                              | 0.74 | 1.09 | 1.61 | 1.10 | 2  | 31.635  | 6.37 | 0.33  | 2  |
| A0A178VV72                   | Glycine cleavage system H protein                                                                          | 1.99 | 1.14 | 0.69 | 1.21 | 2  | 17.936  | 5.34 | 0.52  | 1  |
| A0A178WFY3                   | Serine/threonine-protein phosphatase                                                                       | 1.04 | 1.45 | 2.33 | 1.43 | 1  | 35.019  | 5.01 | 0.12  | 1  |



|            |                                                                         |      |      |      |      |    |         |      |      |    |
|------------|-------------------------------------------------------------------------|------|------|------|------|----|---------|------|------|----|
| A0A1P8AMY1 | 3-phosphoserine phosphatase                                             | 0.70 | 1.38 | 1.70 | 0.87 | 1  | 31.004  | 6.96 | 0.14 | 1  |
| A0A1P8ANY1 | Semialdehyde dehydrogenase family protein                               | 1.02 | 1.34 | 0.85 | 0.65 | 5  | 33.218  | 7.58 | 1.03 | 2  |
| A0A1P8API2 | Serine protease inhibitor (SERPIN) family protein                       | 1.25 | 1.52 | 0.78 | 0.71 | 2  | 45.785  | 5.74 | 0.20 | 2  |
| A0A1P8APT9 | Aspartate aminotransferase                                              | 1.19 | 0.80 | 1.15 | 1.71 | 2  | 37.273  | 6.27 | 0.27 | 1  |
| A0A1P8AUR1 | Class I glutamine amidotransferase-like superfamily protein             | 2.02 | 1.96 | 0.73 | 0.75 | 1  | 40.336  | 7.05 | 0.13 | 1  |
| A0A1P8AZ64 | Glutamate decarboxylase                                                 | 1.10 | 0.71 | 0.45 | 0.69 | 2  | 61.999  | 7.53 | 0.16 | 1  |
| A0A1P8BCC6 | Probable alanine--tRNA ligase, chloroplastic                            | 1.20 | 1.52 | 0.76 | 0.72 | 1  | 111.006 | 5.97 | 0.03 | 1  |
| A0A1P8BFA4 | Glutathione S-transferase family protein                                | 0.76 | 0.49 | 0.75 | 1.15 | 1  | 31.141  | 5.4  | 0.12 | 1  |
| A8MS68     | Dihydrolipoyl dehydrogenase 1, chloroplastic                            | 1.01 | 1.20 | 0.70 | 0.59 | 5  | 66.62   | 8.41 | 0.40 | 4  |
| B0LZ74     | Phenylalanine ammonia-lyase (Fragment)                                  | 0.80 | 1.08 | 1.74 | 1.30 | 1  | 21.744  | 6.61 | 0.26 | 1  |
| B0LZ83     | Phenylalanine ammonia-lyase (Fragment)                                  | 0.75 | 1.08 | 1.74 | 1.21 | 1  | 21.543  | 6.61 | 0.26 | 1  |
| B3H4D0     | Glutathione S-transferase family protein                                | 0.78 | 0.49 | 0.71 | 1.12 | 1  | 31.113  | 5.24 | 0.13 | 1  |
| B3H5E3     | Delta 1-pyrroline-5-carboxylate synthase 2                              | 1.26 | 1.45 | 0.71 | 0.62 | 2  | 67.649  | 7.39 | 0.06 | 1  |
| B3H778     | Arginosuccinate synthase family                                         | 1.97 | 0.84 | 0.70 | 1.64 | 2  | 48.998  | 7.72 | 0.16 | 2  |
| B9DFG0     | AT2G39800 protein                                                       | 1.16 | 1.89 | 0.85 | 0.52 | 2  | 66.718  | 5.94 | 0.06 | 1  |
| B9DFR6     | Cysteine synthase                                                       | 1.87 | 0.79 | 0.70 | 1.66 | 3  | 46.086  | 8.37 | 0.29 | 2  |
| F4I0D4     | Aspartate aminotransferase                                              | 1.20 | 1.34 | 0.69 | 0.62 | 2  | 44.573  | 6.73 | 0.21 | 1  |
| F4J9F7     | Cysteine synthase                                                       | 1.74 | 0.82 | 0.79 | 1.69 | 3  | 46.058  | 9.06 | 0.28 | 2  |
| F4JIZ3     | Phospho-2-dehydro-3-deoxyheptonate aldolase                             | 1.83 | 1.35 | 0.71 | 0.96 | 2  | 38.626  | 7.55 | 0.23 | 0  |
| F4JTH0     | Aspartate aminotransferase                                              | 1.01 | 1.40 | 0.84 | 0.61 | 13 | 49.293  | 7.87 | 1.31 | 10 |
| F4JW69     | Phenylalanine ammonia-lyase                                             | 0.80 | 1.08 | 1.74 | 1.30 | 1  | 76.626  | 6.51 | 0.05 | 1  |
| F4K2Y3     | Alpha/beta-Hydrolases superfamily protein                               | 1.20 | 1.70 | 0.96 | 1.68 | 1  | 81.255  | 5.8  | 0.06 | 1  |
| O23254     | Serine hydroxymethyltransferase 4                                       | 0.85 | 1.42 | 1.65 | 0.98 | 4  | 51.685  | 7.23 | 0.41 | 3  |
| O50008     | 5-methyltetrahydropteroyltriglutamate--homocysteine methyltransferase 1 | 1.66 | 1.24 | 0.72 | 0.96 | 64 | 84.304  | 6.51 | 2.31 | 8  |
| O80988     | Glycine dehydrogenase (decarboxylating) 2, mitochondrial                | 1.83 | 1.35 | 0.72 | 0.97 | 2  | 113.703 | 6.65 | 0.05 | 1  |
| O82796     | Phosphoserine phosphatase, chloroplastic                                | 0.87 | 1.37 | 1.61 | 1.02 | 1  | 32.298  | 6.38 | 0.12 | 1  |
| P17597     | Acetolactate synthase, chloroplastic                                    | 1.06 | 0.79 | 1.41 | 1.89 | 1  | 72.539  | 6.65 | 0.08 | 1  |
| P29976     | Phospho-2-dehydro-3-deoxyheptonate aldolase 1, chloroplastic            | 1.76 | 0.79 | 0.72 | 1.62 | 5  | 57.942  | 8.06 | 0.37 | 3  |
| P32068     | Anthranilate synthase alpha subunit 1, chloroplastic                    | 1.06 | 0.73 | 1.20 | 1.74 | 1  | 66.269  | 6.49 | 0.06 | 1  |
| P45724     | Phenylalanine ammonia-lyase 2                                           | 0.74 | 1.07 | 1.75 | 1.22 | 1  | 77.811  | 6.46 | 0.05 | 1  |
| P45725     | Phenylalanine ammonia-lyase 3                                           | 0.70 | 1.07 | 1.72 | 1.13 | 1  | 76.193  | 6.51 | 0.06 | 1  |
| P46248     | Aspartate aminotransferase, chloroplastic                               | 1.35 | 0.71 | 0.85 | 1.62 | 13 | 49.799  | 8.15 | 1.31 | 10 |

|        |                                                                                                                    |      |      |      |      |    |         |      |      |   |
|--------|--------------------------------------------------------------------------------------------------------------------|------|------|------|------|----|---------|------|------|---|
| P46422 | Glutathione S-transferase F2                                                                                       | 1.75 | 1.15 | 0.37 | 1.22 | 11 | 24.114  | 6.35 | 1.51 | 3 |
| P46643 | Aspartate aminotransferase, mitochondrial                                                                          | 1.27 | 0.76 | 1.00 | 1.67 | 20 | 47.727  | 8.19 | 2.43 | 9 |
| P46646 | Aspartate aminotransferase, cytoplasmic isozyme 2                                                                  | 1.29 | 0.80 | 1.09 | 1.76 | 2  | 44.33   | 6.55 | 0.21 | 1 |
| P54887 | Delta-1-pyrroline-5-carboxylate synthase A                                                                         | 1.16 | 1.69 | 0.83 | 0.51 | 2  | 77.654  | 6.29 | 0.05 | 1 |
| P54888 | Delta-1-pyrroline-5-carboxylate synthase B                                                                         | 1.14 | 1.40 | 0.70 | 0.57 | 2  | 78.822  | 6.81 | 0.05 | 1 |
| Q0WNZ5 | 5-methyltetrahydropteroyltriglutamate-homocysteine methyltransferase 3, chloroplastic                              | 1.65 | 1.16 | 0.78 | 1.10 | 22 | 90.537  | 8.05 | 0.50 | 1 |
| Q1H5A3 | Glutamate dehydrogenase                                                                                            | 1.77 | 1.25 | 0.75 | 1.07 | 3  | 44.496  | 6.86 | 0.30 | 3 |
| Q42521 | Glutamate decarboxylase 1                                                                                          | 1.15 | 1.39 | 1.80 | 1.49 | 2  | 57.03   | 5.53 | 0.18 | 1 |
| Q43725 | Cysteine synthase, mitochondrial                                                                                   | 1.87 | 0.81 | 0.71 | 1.64 | 3  | 45.786  | 8.18 | 0.29 | 2 |
| Q56YA5 | Serine--glyoxylate aminotransferase                                                                                | 1.22 | 1.61 | 1.02 | 0.77 | 3  | 44.18   | 7.83 | 0.35 | 3 |
| Q8GXW5 | Glutamine synthetase cytosolic isozyme 1-5                                                                         | 1.07 | 0.93 | 1.36 | 1.57 | 4  | 38.883  | 6.65 | 0.54 | 1 |
| Q8H107 | Dihydrolipoyllysine-residue succinyltransferase component of 2-oxoglutarate dehydrogenase complex 2, mitochondrial | 1.80 | 1.32 | 0.76 | 1.04 | 1  | 50.028  | 9.09 | 0.10 | 1 |
| Q93WN0 | Selenium-binding protein 2                                                                                         | 1.91 | 2.02 | 0.74 | 0.70 | 1  | 53.903  | 6.19 | 0.09 | 1 |
| Q94AR8 | 3-isopropylmalate dehydratase large subunit, chloroplastic                                                         | 1.27 | 0.83 | 1.08 | 1.65 | 4  | 54.979  | 7.84 | 0.39 | 4 |
| Q9FL95 | At5g45020/K21C13_21                                                                                                | 0.73 | 0.50 | 0.78 | 1.13 | 1  | 37.319  | 6.33 | 0.11 | 1 |
| Q9FL98 | Glutathione S-transferase family protein                                                                           | 0.74 | 0.50 | 0.77 | 1.13 | 1  | 40.587  | 5.59 | 0.10 | 1 |
| Q9LDV4 | Alanine aminotransferase 2, mitochondrial                                                                          | 0.97 | 1.19 | 0.72 | 0.59 | 2  | 59.473  | 6.38 | 0.15 | 2 |
| Q9LFG2 | Diaminopimelate epimerase, chloroplastic                                                                           | 1.07 | 0.85 | 1.22 | 1.54 | 3  | 38.959  | 5.68 | 0.35 | 3 |
| Q9LIR4 | Dihydroxy-acid dehydratase, chloroplastic                                                                          | 1.23 | 0.87 | 1.14 | 1.61 | 4  | 64.872  | 6.23 | 0.32 | 3 |
| Q9LJA0 | Putative inactive cysteine synthase 2                                                                              | 1.28 | 0.92 | 1.09 | 1.51 | 5  | 19.625  | 7.93 | 1.15 | 3 |
| Q9LT69 | D-3-phosphoglycerate dehydrogenase 3, chloroplastic                                                                | 0.86 | 1.06 | 1.62 | 1.32 | 1  | 62.083  | 8.24 | 0.07 | 1 |
| Q9LTB2 | Methionine S-methyltransferase                                                                                     | 1.80 | 1.41 | 0.72 | 0.92 | 4  | 118.641 | 5.63 | 0.18 | 4 |
| Q9LYT7 | 3-isopropylmalate dehydratase small subunit 2                                                                      | 1.87 | 1.01 | 0.74 | 1.37 | 1  | 27.191  | 6.87 | 0.14 | 1 |
| Q9LZX6 | 4-hydroxy-tetrahydrodipicolinate synthase 1, chloroplastic                                                         | 1.01 | 1.47 | 0.69 | 0.48 | 1  | 40.595  | 7.14 | 0.12 | 1 |
| Q9M8D3 | Probable phosphoribosylformylglycinamide synthase, chloroplastic/mitochondrial                                     | 1.18 | 0.75 | 1.12 | 1.76 | 1  | 153.856 | 5.36 | 0.03 | 1 |
| Q9S757 | Bifunctional L-3-cyanoalanine synthase/cysteine synthase C1, mitochondrial                                         | 1.83 | 0.79 | 0.72 | 1.66 | 5  | 39.902  | 8.54 | 0.67 | 2 |
| Q9S7E9 | Glutamate--glyoxylate aminotransferase 2                                                                           | 1.23 | 1.32 | 2.66 | 2.46 | 8  | 53.41   | 6.58 | 0.66 | 2 |

|                         |                                                                                |      |      |      |      |    |        |      |      |    |
|-------------------------|--------------------------------------------------------------------------------|------|------|------|------|----|--------|------|------|----|
| Q9SHH7                  | Glutathione S-transferase U25                                                  | 1.76 | 1.15 | 0.74 | 1.13 | 3  | 25.574 | 5.3  | 0.29 | 1  |
| Q9SK84                  | Phospho-2-dehydro-3-deoxyheptonate aldolase                                    | 1.70 | 1.18 | 0.75 | 1.09 | 2  | 58.29  | 8.32 | 0.15 | 0  |
| Q9SLM6                  | Glutathione S-transferase F3                                                   | 1.74 | 1.12 | 0.37 | 1.24 | 12 | 24.106 | 6.74 | 1.93 | 4  |
| Q9SS45                  | Phenylalanine ammonia-lyase 4                                                  | 0.79 | 1.08 | 1.76 | 1.30 | 1  | 76.871 | 6.27 | 0.06 | 1  |
| Q9SZX3                  | Argininosuccinate synthase, chloroplastic                                      | 1.70 | 0.81 | 0.75 | 1.59 | 2  | 53.812 | 6.67 | 0.14 | 2  |
| Q9ZPS3                  | Glutamate decarboxylase 4                                                      | 1.10 | 1.38 | 1.82 | 1.46 | 2  | 55.97  | 6.34 | 0.18 | 1  |
| <b>Lipid metabolism</b> |                                                                                |      |      |      |      |    |        |      |      |    |
| A0A160CBM4              | Acyl-[acyl-carrier-protein] desaturase                                         | 1.15 | 0.75 | 1.23 | 1.88 | 6  | 45.675 | 6.4  | 0.56 | 4  |
| A0A178UA38              | Acyl-coenzyme A oxidase                                                        | 1.04 | 0.81 | 1.32 | 1.69 | 1  | 77.432 | 8.29 | 0.05 | 1  |
| A0A178ULR4              | Biotin carboxyl carrier protein of acetyl-CoA carboxylase                      | 0.73 | 1.04 | 1.58 | 1.11 | 3  | 26.911 | 9.54 | 0.64 | 3  |
| A0A178VYR6              | CAC3                                                                           | 1.02 | 1.18 | 0.71 | 0.61 | 2  | 85.253 | 5.82 | 0.10 | 2  |
| A0A178VZQ3              | Non-specific lipid-transfer protein                                            | 1.92 | 1.20 | 0.72 | 1.15 | 5  | 11.747 | 8.95 | 1.68 | 1  |
| A0A178WDE4              | Acyl-coenzyme A oxidase                                                        | 1.22 | 1.48 | 0.72 | 0.59 | 4  | 75.629 | 7.99 | 0.24 | 2  |
| A0A1B1W4V3              | Acetyl-coenzyme A carboxylase carboxyl transferase subunit beta, chloroplastic | 1.92 | 0.90 | 0.75 | 1.59 | 3  | 55.574 | 6.24 | 0.26 | 2  |
| A0A1I9LST4              | 3-hydroxyacyl-CoA dehydrogenase family protein                                 | 0.78 | 0.89 | 1.66 | 1.46 | 2  | 25.764 | 6.54 | 0.36 | 2  |
| A0A1P8AVA7              | Saposin-like aspartyl protease family protein                                  | 2.05 | 1.24 | 0.68 | 1.12 | 5  | 52.741 | 6.95 | 0.41 | 2  |
| B0FFQ6                  | AccD (Fragment)                                                                | 1.92 | 0.91 | 0.72 | 1.51 | 2  | 12.468 | 8.62 | 0.93 | 1  |
| B9DGD6                  | Acetyl-coenzyme A synthetase, chloroplastic/glyoxysomal                        | 1.10 | 0.87 | 1.35 | 1.71 | 4  | 81.837 | 6.09 | 0.26 | 3  |
| F4JBY2                  | Transketolase                                                                  | 1.14 | 0.77 | 1.26 | 1.87 | 24 | 79.789 | 6.43 | 1.04 | 10 |
| F4JKM2                  | Cinnamyl alcohol dehydrogenase 5                                               | 1.03 | 1.40 | 0.83 | 0.61 | 1  | 38.691 | 5.44 | 0.12 | 1  |
| F4KGI8                  | Acyl-coenzyme A oxidase                                                        | 1.14 | 0.74 | 1.08 | 1.66 | 1  | 72.216 | 8.46 | 0.05 | 1  |
| O22832                  | Stearoyl-[acyl-carrier-protein] 9-desaturase 7, chloroplastic                  | 1.34 | 0.77 | 0.93 | 1.62 | 6  | 45.664 | 6.48 | 0.53 | 4  |
| O80526                  | ATP-citrate synthase alpha chain protein 3                                     | 1.05 | 1.59 | 0.86 | 0.48 | 2  | 46.916 | 5.26 | 0.22 | 1  |
| P0CZ24                  | Putative acyl-coenzyme A oxidase At3g06690                                     | 1.17 | 0.81 | 1.26 | 1.81 | 3  | 21.024 | 5.63 | 0.87 | 1  |
| P56765                  | Acetyl-coenzyme A carboxylase carboxyl transferase subunit beta, chloroplastic | 1.76 | 0.79 | 0.73 | 1.61 | 3  | 55.6   | 6.24 | 0.26 | 2  |
| Q42533                  | Biotin carboxyl carrier protein of acetyl-CoA carboxylase 1, chloroplastic     | 0.81 | 1.40 | 1.61 | 0.93 | 3  | 29.594 | 9.06 | 0.64 | 3  |
| Q494P3                  | At3g17770                                                                      | 1.44 | 1.24 | 0.49 | 0.56 | 1  | 61.882 | 5.14 | 0.07 | 1  |
| Q8LF48                  | 3-ketoacyl-CoA thiolase 1, peroxisomal                                         | 1.05 | 1.44 | 0.71 | 0.52 | 7  | 46.582 | 8.29 | 0.47 | 1  |
| Q8LPS1                  | Long chain acyl-CoA synthetase 6, peroxisomal                                  | 1.12 | 1.35 | 0.79 | 0.65 | 1  | 76.555 | 7.93 | 0.06 | 1  |
| Q8RWZ3                  | Probable acyl-CoA dehydrogenase IBR3                                           | 1.24 | 1.90 | 0.93 | 0.81 | 2  | 91.655 | 8.32 | 0.09 | 2  |
| Q93ZC5                  | Allene oxide cyclase 4, chloroplastic                                          | 1.70 | 1.79 | 0.73 | 0.70 | 2  | 27.792 | 9.07 | 0.16 | 1  |

|                              |                                                                       |      |      |      |      |    |        |       |       |   |
|------------------------------|-----------------------------------------------------------------------|------|------|------|------|----|--------|-------|-------|---|
| Q94A94                       | Diaminopimelate decarboxylase 2, chloroplastic                        | 1.87 | 1.35 | 0.69 | 0.96 | 2  | 54.13  | 6.67  | 0.16  | 2 |
| Q9C5N8                       | GDSL esterase/lipase At1g54020                                        | 1.90 | 1.36 | 0.69 | 0.96 | 1  | 41.774 | 7.94  | 0.11  | 1 |
| Q9FLW9                       | Plastidial pyruvate kinase 2                                          | 0.89 | 1.23 | 1.57 | 1.14 | 3  | 63.481 | 7.03  | 0.22  | 3 |
| Q9LDF5                       | 3-hydroxyacyl-CoA dehydrogenase family protein                        | 0.72 | 0.85 | 1.66 | 1.41 | 2  | 31.669 | 7.09  | 0.31  | 2 |
| Q9LF04                       | Stearoyl-[acyl-carrier-protein] 9-desaturase 1, chloroplastic         | 1.27 | 0.74 | 1.16 | 1.99 | 3  | 44.99  | 6.55  | 0.19  | 2 |
| Q9LMI7                       | Putative acyl-coenzyme A oxidase 3.2, peroxisomal                     | 1.19 | 2.36 | 0.79 | 0.40 | 2  | 75.852 | 7.85  | 0.11  | 1 |
| Q9M879                       | Stearoyl-[acyl-carrier-protein] 9-desaturase 5, chloroplastic         | 1.27 | 0.69 | 1.08 | 1.99 | 3  | 45.274 | 6.23  | 0.19  | 2 |
| Q9SIE3                       | At2g22230/T26C19.11                                                   | 1.55 | 1.54 | 0.70 | 0.70 | 1  | 24.226 | 8.48  | 0.23  | 1 |
| Q9T0A0                       | Long chain acyl-CoA synthetase 4                                      | 1.07 | 1.37 | 0.72 | 0.56 | 1  | 74.46  | 5.87  | 0.07  | 1 |
| Q9ZPI5                       | Peroxisomal fatty acid beta-oxidation multifunctional protein MFP2    | 0.99 | 1.30 | 0.72 | 0.55 | 17 | 78.79  | 9.17  | 0.73  | 9 |
| <b>Nucleotide metabolism</b> |                                                                       |      |      |      |      |    |        |       |       |   |
| A0A178UAM7                   | ADK1                                                                  | 2.17 | 2.37 | 1.43 | 1.31 | 6  | 26.915 | 7.36  | 0.62  | 1 |
| A0A178VGZ6                   | Dihydrolipoyl dehydrogenase                                           | 1.21 | 0.91 | 1.21 | 1.62 | 5  | 60.719 | 8.09  | 0.47  | 4 |
| A0A178VRA7                   | MORF6                                                                 | 0.73 | 0.58 | 0.73 | 0.91 | 1  | 26.351 | 8.9   | 0.19  | 1 |
| F4HNZ6                       | Glyceraldehyde 3-phosphate dehydrogenase A subunit 2                  | 1.24 | 1.79 | 0.99 | 0.68 | 20 | 34.311 | 6.64  | 3.64  | 5 |
| F4HQT1                       | Glyceraldehyde-3-phosphate dehydrogenase C2                           | 1.26 | 0.84 | 1.12 | 1.68 | 78 | 33.885 | 7.21  | 6.08  | 8 |
| F4JWF6                       | DEAD/DEAH box RNA helicase family protein                             | 1.13 | 1.61 | 0.85 | 0.70 | 6  | 55.429 | 5.92  | 0.39  | 5 |
| O49203                       | Nucleoside diphosphate kinase III, chloroplastic/mitochondrial        | 1.21 | 0.81 | 1.08 | 1.62 | 4  | 25.718 | 9.23  | 0.29  | 1 |
| O64767                       | AICARFT/IMPCHase bienzyme family protein                              | 1.13 | 0.90 | 1.30 | 1.63 | 4  | 59.434 | 6.3   | 0.24  | 3 |
| P59259                       | Histone H4                                                            | 0.93 | 1.70 | 0.82 | 0.71 | 9  | 11.402 | 11.47 | 13.68 | 5 |
| P69834                       | 2-C-methyl-D-erythritol 4-phosphate cytidyltransferase, chloroplastic | 1.15 | 0.90 | 1.28 | 1.63 | 1  | 33.916 | 6.16  | 0.14  | 1 |
| Q1WIQ6                       | NADP-dependent glyceraldehyde-3-phosphate dehydrogenase               | 1.21 | 0.71 | 0.97 | 1.65 | 15 | 53.026 | 6.64  | 1.26  | 9 |
| Q68117                       | Uncharacterized protein At4g09040                                     | 0.56 | 0.71 | 0.90 | 0.71 | 1  | 33.997 | 7.59  | 0.18  | 1 |
| Q96529                       | Adenylosuccinate synthetase, chloroplastic                            | 1.81 | 1.28 | 0.72 | 1.01 | 8  | 52.931 | 7.14  | 0.40  | 5 |
| Q9C7Y2                       | Multiple organellar RNA editing factor 5, chloroplastic/mitochondrial | 1.36 | 1.72 | 1.43 | 1.13 | 1  | 26.008 | 9.11  | 0.19  | 1 |
| Q9LVI8                       | Glutamine synthetase cytosolic isozyme 1-3                            | 1.09 | 0.82 | 1.35 | 1.79 | 15 | 38.57  | 6.06  | 1.74  | 3 |
| Q9SYL9                       | 50S ribosomal protein L13, chloroplastic                              | 4.28 | 1.30 | 0.26 | 0.86 | 2  | 26.772 | 9.92  | 0.18  | 1 |
| <b>Energy</b>                |                                                                       |      |      |      |      |    |        |       |       |   |
| A0A178VRB0                   | Chlorophyll a-b binding protein, chloroplastic                        | 0.89 | 1.27 | 1.58 | 1.10 | 7  | 28.036 | 5.44  | 1.15  | 1 |
| A0A178W2T0                   | Chlorophyll a-b binding protein, chloroplastic                        | 0.76 | 1.00 | 1.58 | 1.20 | 5  | 28.209 | 5.43  | 0.78  | 0 |
| A0A178W4V2                   | ACLA-1                                                                | 1.05 | 2.01 | 0.86 | 0.45 | 3  | 46.649 | 5.5   | 0.33  | 1 |

|                       |                                                        |      |      |      |      |    |         |       |      |    |
|-----------------------|--------------------------------------------------------|------|------|------|------|----|---------|-------|------|----|
| A0A178WKX1            | Chlorophyll a-b binding protein, chloroplastic         | 0.89 | 1.30 | 1.57 | 1.08 | 5  | 28.223  | 5.66  | 0.78 | 0  |
| A0A1B1W4S7            | Photosystem II protein D1                              | 0.76 | 1.08 | 1.72 | 1.20 | 1  | 38.911  | 5.25  | 0.21 | 1  |
| A0A1B1W4U2            | Photosystem I P700 chlorophyll a apoprotein A2         | 0.78 | 1.37 | 1.88 | 1.07 | 4  | 82.423  | 7.4   | 0.62 | 2  |
| A0A1I9LMB4            | Chlorophyll a-b binding protein, chloroplastic         | 0.89 | 1.27 | 1.57 | 1.10 | 9  | 32.567  | 6.23  | 1.85 | 1  |
| A0A1I9LS90            | Photosystem II subunit T                               | 0.75 | 0.53 | 0.78 | 1.12 | 4  | 15.623  | 9.63  | 1.00 | 1  |
| A0A1P8AZ91            | Chlorophyll a-b binding protein, chloroplastic         | 0.89 | 1.26 | 1.57 | 1.11 | 9  | 35.131  | 7.02  | 1.15 | 1  |
| A0A1P8B6D0            | Photosystem I subunit I                                | 0.93 | 2.18 | 0.81 | 0.73 | 1  | 30.422  | 10.14 | 0.18 | 1  |
| F4JZ46                | Ferredoxin--NADP reductase                             | 0.86 | 1.38 | 1.63 | 1.02 | 3  | 29.665  | 6.15  | 0.37 | 3  |
| O23404                | Pyruvate, phosphate dikinase 1, chloroplastic          | 1.89 | 1.35 | 0.74 | 1.03 | 15 | 105.071 | 6.38  | 0.60 | 7  |
| O49506                | Peroxisomal (S)-2-hydroxy-acid oxidase GLO5            | 1.01 | 1.40 | 0.70 | 0.51 | 12 | 40.456  | 8.31  | 1.46 | 1  |
| P56761                | Photosystem II D2 protein                              | 0.82 | 1.37 | 1.72 | 1.02 | 3  | 39.522  | 5.74  | 0.87 | 3  |
| P56777                | Photosystem II CP47 reaction center protein            | 0.77 | 1.42 | 1.57 | 0.85 | 1  | 56.001  | 6.89  | 0.12 | 1  |
| Q07473                | Chlorophyll a-b binding protein CP29.1, chloroplastic  | 0.82 | 1.41 | 1.59 | 0.92 | 8  | 31.12   | 6.14  | 0.59 | 1  |
| Q39195                | Photosystem II 5 kDa protein, chloroplastic            | 1.40 | 0.54 | 1.38 | 1.45 | 4  | 11.021  | 9.48  | 1.37 | 1  |
| Q3ZVE1                | ATPase alpha subunit (Fragment)                        | 1.21 | 1.62 | 0.88 | 0.75 | 13 | 19.75   | 5.55  | 2.98 | 4  |
| Q3ZVE2                | ATPase alpha subunit (Fragment)                        | 1.21 | 1.62 | 0.88 | 0.77 | 13 | 19.663  | 5.55  | 2.98 | 4  |
| Q42536                | Protochlorophyllide reductase A, chloroplastic         | 1.65 | 1.36 | 0.83 | 1.02 | 31 | 43.836  | 9.36  | 3.13 | 3  |
| Q5GM68                | Phosphoenolpyruvate carboxylase 2                      | 0.85 | 1.41 | 1.65 | 1.00 | 3  | 109.684 | 5.8   | 0.10 | 2  |
| Q84VW9                | Phosphoenolpyruvate carboxylase 3                      | 0.81 | 1.40 | 1.61 | 0.93 | 7  | 110.091 | 6.04  | 0.25 | 5  |
| Q8HS55                | Photosystem II CP47 reaction center protein (Fragment) | 0.77 | 1.42 | 1.57 | 0.85 | 1  | 51.951  | 6.61  | 0.14 | 1  |
| Q8HT11                | Photosystem II CP43 reaction center protein (Fragment) | 1.63 | 1.66 | 0.77 | 0.76 | 1  | 43.973  | 7.59  | 0.19 | 1  |
| Q8HT12                | Photosystem II D2 protein (Fragment)                   | 0.82 | 1.38 | 1.72 | 1.01 | 3  | 35.22   | 5.91  | 1.15 | 3  |
| Q9LMQ2                | Chlorophyll a-b binding protein, chloroplastic         | 0.82 | 1.34 | 1.58 | 0.97 | 10 | 27.505  | 7.4   | 1.89 | 3  |
| Q9S7D8                | ATP sulfurylase 4, chloroplastic                       | 1.54 | 0.76 | 0.83 | 1.67 | 4  | 52.093  | 8.87  | 0.33 | 1  |
| <b>Defense/Stress</b> |                                                        |      |      |      |      |    |         |       |      |    |
| A0A178VD55            | GOX2                                                   | 1.15 | 2.69 | 0.91 | 0.39 | 17 | 40.908  | 8.76  | 2.02 | 3  |
| A0A178VGA9            | SOX                                                    | 1.82 | 0.84 | 0.74 | 1.60 | 4  | 43.302  | 8.68  | 0.32 | 3  |
| A0A1P8AWT7            | Catalase 3                                             | 0.99 | 0.89 | 1.46 | 1.63 | 61 | 63.519  | 8.9   | 3.25 | 7  |
| A8MQK8                | 60S acidic ribosomal protein family                    | 1.85 | 1.06 | 0.72 | 1.25 | 1  | 9.994   | 4.36  | 0.59 | 1  |
| B9DG18                | AT1G20620 protein                                      | 1.05 | 0.75 | 1.13 | 1.59 | 61 | 55.932  | 7.64  | 4.41 | 7  |
| B9DG21                | Aspartate aminotransferase                             | 1.28 | 0.91 | 1.15 | 1.62 | 13 | 50.942  | 7.53  | 1.31 | 10 |
| D7L5Q3                | JR1                                                    | 1.89 | 1.38 | 0.73 | 1.00 | 1  | 48.491  | 5.33  | 0.11 | 1  |
| F4HUL6                | Catalase 3                                             | 0.83 | 1.41 | 1.56 | 0.92 | 58 | 48.867  | 6.8   | 4.88 | 6  |
| F4IQ05                | Peroxidase                                             | 1.72 | 1.87 | 1.69 | 1.56 | 1  | 33.25   | 7.68  | 0.14 | 1  |
| F4J504                | Superoxide dismutase                                   | 1.97 | 1.23 | 1.44 | 2.31 | 3  | 25.33   | 8.48  | 0.70 | 3  |
| F4K0T5                | Anthranilate synthase alpha subunit 1                  | 0.91 | 0.83 | 1.51 | 1.65 | 1  | 69.63   | 6.44  | 0.06 | 1  |

|        |                                                            |      |      |      |      |    |        |      |      |   |
|--------|------------------------------------------------------------|------|------|------|------|----|--------|------|------|---|
| O04309 | Jacalin-related lectin 35                                  | 1.88 | 1.40 | 0.69 | 0.93 | 1  | 48.467 | 5.26 | 0.11 | 1 |
| O49326 | Nitrile-specifier protein 2                                | 1.35 | 1.71 | 1.53 | 1.21 | 2  | 51.18  | 5.76 | 0.16 | 1 |
| O80852 | Glutathione S-transferase F9                               | 1.82 | 2.10 | 1.53 | 1.33 | 20 | 24.13  | 6.65 | 6.74 | 3 |
| O80889 | Alpha/beta-Hydrolases superfamily protein                  | 1.21 | 0.84 | 1.19 | 1.71 | 2  | 25.905 | 5.47 | 0.43 | 2 |
| P25819 | Catalase-2                                                 | 1.99 | 2.17 | 1.17 | 1.07 | 77 | 56.9   | 7.12 | 4.74 | 6 |
| P37702 | Myrosinase 1                                               | 2.05 | 1.91 | 1.44 | 1.54 | 15 | 61.09  | 5.92 | 0.32 | 1 |
| P57751 | UTP--glucose-1-phosphate uridylyltransferase 1             | 1.12 | 0.95 | 1.32 | 1.56 | 23 | 51.887 | 6.01 | 1.25 | 8 |
| Q0WUH6 | Catalase                                                   | 1.67 | 0.82 | 0.76 | 1.56 | 33 | 56.726 | 7.42 | 3.18 | 4 |
| Q2V4M4 | Catalase 3                                                 | 1.02 | 0.81 | 1.21 | 1.52 | 25 | 43.921 | 7.61 | 3.49 | 7 |
| Q38814 | Thiamine thiazole synthase, chloroplastic                  | 1.83 | 1.15 | 0.77 | 1.22 | 11 | 36.641 | 6.23 | 1.15 | 3 |
| Q39101 | Ferritin (Fragment)                                        | 0.75 | 1.00 | 1.86 | 1.40 | 4  | 5.787  | 4.88 | 1.15 | 1 |
| Q41931 | 1-aminocyclopropane-1-carboxylate oxidase 2                | 1.91 | 1.11 | 0.73 | 1.26 | 4  | 36.16  | 5.12 | 0.62 | 3 |
| Q42547 | Catalase-3                                                 | 0.99 | 0.95 | 1.48 | 1.55 | 61 | 56.66  | 7.64 | 4.41 | 7 |
| Q8RWT5 | AICARFT/IMPCHase family protein                            | 1.19 | 0.75 | 1.22 | 1.93 | 4  | 64.866 | 6.92 | 0.21 | 3 |
| Q8RY71 | Epithiospecifier protein                                   | 1.97 | 2.67 | 1.11 | 0.82 | 7  | 36.99  | 5.86 | 0.30 | 2 |
| Q9C5C2 | Myrosinase 2                                               | 2.14 | 2.10 | 1.06 | 1.08 | 11 | 62.69  | 7.44 | 0.35 | 1 |
| Q9FLC0 | Peroxidase 52                                              | 1.68 | 1.65 | 0.96 | 0.98 | 2  | 34.19  | 8.31 | 0.36 | 1 |
| Q9FNK4 | Ornithine aminotransferase, mitochondrial                  | 1.09 | 1.42 | 0.75 | 0.58 | 1  | 52.145 | 7.44 | 0.08 | 1 |
| Q9LZ66 | Assimilatory sulfite reductase (ferredoxin), chloroplastic | 1.07 | 0.87 | 1.36 | 1.68 | 4  | 71.905 | 8.31 | 0.32 | 4 |
| Q9M9P3 | UTP--glucose-1-phosphate uridylyltransferase 2             | 1.19 | 0.81 | 1.07 | 1.57 | 18 | 51.706 | 6.13 | 0.81 | 6 |
| Q9S7J7 | Chlorophyll a-b binding protein 2.2, chloroplastic         | 0.83 | 1.24 | 1.57 | 1.05 | 9  | 28.602 | 5.43 | 1.85 | 1 |
| Q9SHR7 | Chlorophyll a-b binding protein 2.1, chloroplastic         | 0.89 | 1.25 | 1.57 | 1.12 | 9  | 28.631 | 5.43 | 1.85 | 1 |
| Q9SMU8 | Peroxidase 34                                              | 2.15 | 2.37 | 1.17 | 1.06 | 1  | 38.81  | 7.64 | 0.12 | 1 |
| Q9SYG7 | Aldehyde dehydrogenase family 7 member B4                  | 0.87 | 1.08 | 1.60 | 1.30 | 1  | 54.174 | 5.54 | 0.08 | 1 |

### Protein biosynthesis

|            |                                              |      |      |      |      |    |         |       |      |   |
|------------|----------------------------------------------|------|------|------|------|----|---------|-------|------|---|
| A0A103P898 | Ribosomal protein PO (Fragment)              | 1.19 | 1.54 | 0.71 | 0.70 | 2  | 8.648   | 9.64  | 2.16 | 1 |
| A0A178U9H3 | Probable alanine--tRNA ligase, chloroplastic | 0.98 | 1.60 | 0.80 | 0.71 | 1  | 107.764 | 5.59  | 0.04 | 1 |
| A0A178UFG0 | 40S ribosomal protein S4                     | 0.73 | 1.16 | 1.64 | 1.03 | 12 | 29.855  | 10.17 | 2.16 | 7 |
| A0A178V6A2 | 60S ribosomal protein L13                    | 0.72 | 1.26 | 1.67 | 0.95 | 4  | 23.488  | 10.55 | 0.36 | 1 |
| A0A178V9F6 | Histone H2B                                  | 0.78 | 0.96 | 1.71 | 1.39 | 3  | 16.426  | 10.02 | 0.59 | 2 |
| A0A178VBG6 | 40S ribosomal protein S3a                    | 0.75 | 1.15 | 1.66 | 1.08 | 4  | 29.832  | 9.76  | 0.54 | 1 |
| A0A178VGU6 | Histone H2B                                  | 0.82 | 0.99 | 1.71 | 1.41 | 3  | 15.902  | 10.02 | 0.59 | 2 |
| A0A178VSS0 | EMB2296                                      | 0.78 | 1.00 | 1.66 | 1.30 | 12 | 27.842  | 10.9  | 1.45 | 1 |
| A0A178VWL0 | RPL16A                                       | 1.06 | 1.51 | 0.92 | 0.68 | 4  | 20.818  | 9.92  | 0.87 | 3 |
| A0A178W1V2 | Ribosomal protein                            | 2.60 | 1.18 | 0.36 | 0.80 | 2  | 24.409  | 9.88  | 0.36 | 2 |
| A0A178W2S2 | Serine/threonine-protein phosphatase         | 1.02 | 1.48 | 2.36 | 1.43 | 1  | 34.912  | 4.96  | 0.12 | 1 |
| A0A178W3V2 | UGGT                                         | 1.65 | 1.19 | 0.69 | 0.96 | 1  | 181.818 | 5.83  | 0.02 | 1 |

|            |                                                 |      |      |      |      |    |         |       |      |   |
|------------|-------------------------------------------------|------|------|------|------|----|---------|-------|------|---|
| A0A1B1W4U6 | 30S ribosomal protein S4, chloroplastic         | 0.89 | 1.37 | 1.57 | 1.02 | 3  | 23.226  | 10.33 | 0.78 | 2 |
| A0A1B1W4X5 | 30S ribosomal protein S19, chloroplastic        | 0.82 | 1.62 | 1.56 | 0.79 | 1  | 10.602  | 10.77 | 0.59 | 1 |
| A0A1B1W4Y0 | 50S ribosomal protein L14, chloroplastic        | 1.81 | 1.26 | 0.76 | 1.09 | 3  | 13.573  | 9.29  | 0.59 | 2 |
| A0A1I9LTP2 | Cysteine synthase C1                            | 2.07 | 1.07 | 0.69 | 1.34 | 3  | 36.296  | 8.28  | 0.33 | 1 |
| A0A1J3CNH1 | GF14 protein chi chain (Fragment)               | 1.24 | 1.42 | 2.12 | 1.35 | 8  | 10.402  | 4.41  | 1.68 | 1 |
| A0A1P8AVX3 | EMS-MUTAGENIZED SUPPRESSOR 1 BR11               | 1.82 | 1.37 | 0.74 | 0.98 | 1  | 186.297 | 5.91  | 0.02 | 1 |
| A8MQA1     | 60S ribosomal protein L13                       | 0.82 | 1.27 | 1.58 | 1.02 | 5  | 23.525  | 11    | 0.70 | 2 |
| A8MR49     | Ribosomal protein L31e family protein           | 0.78 | 0.90 | 1.55 | 1.33 | 1  | 9.758   | 9.01  | 0.78 | 1 |
| A8MRV1     | Histone H4                                      | 1.09 | 1.60 | 0.69 | 0.70 | 8  | 9.388   | 11.21 | 9.00 | 4 |
| A8MS54     | RNA-binding (RRM/RBD/RNP motifs) family protein | 2.33 | 1.49 | 1.02 | 1.39 | 1  | 27.686  | 8.97  | 0.21 | 1 |
| B3H4B6     | Ribosomal protein S25 family protein            | 0.78 | 1.30 | 1.79 | 1.08 | 4  | 11.918  | 10.68 | 2.16 | 2 |
| B3H4N7     | 60S acidic ribosomal protein family             | 2.00 | 1.14 | 0.69 | 1.20 | 2  | 11.757  | 4.51  | 0.78 | 1 |
| B9DFS7     | AT4G00810 protein                               | 1.85 | 1.35 | 0.78 | 1.07 | 1  | 11.3    | 4.32  | 0.59 | 1 |
| B9DGN3     | AT2G27710 protein                               | 1.37 | 1.23 | 1.37 | 1.52 | 1  | 11.437  | 4.68  | 0.47 | 1 |
| B9DHP0     | AT4G27090 protein                               | 1.39 | 2.08 | 0.91 | 0.61 | 6  | 15.496  | 10.04 | 2.16 | 3 |
| F4HRW5     | Ribosomal protein L22p/L17e family protein      | 0.89 | 1.25 | 1.57 | 1.12 | 8  | 14.758  | 10.04 | 4.62 | 4 |
| F4IDD6     | tRNA synthetase beta subunit family protein     | 1.18 | 1.61 | 0.83 | 0.71 | 1  | 65.918  | 5.49  | 0.06 | 1 |
| F4IFZ9     | Delta-1-pyrroline-5-carboxylate synthase        | 1.17 | 1.89 | 0.84 | 0.52 | 2  | 77.389  | 6.24  | 0.05 | 1 |
| F4IGR3     | 60S acidic ribosomal protein family             | 1.38 | 1.24 | 1.38 | 1.53 | 1  | 10.237  | 4.68  | 0.47 | 1 |
| F4IHJ8     | Ribosomal protein S25 family protein            | 0.76 | 1.21 | 1.85 | 1.16 | 3  | 11.934  | 10.68 | 1.15 | 1 |
| F4IWP7     | Breast basic conserved 1                        | 0.90 | 1.26 | 1.55 | 1.11 | 5  | 17.737  | 10.55 | 1.15 | 2 |
| F4IZC8     | Alpha-soluble NSF attachment protein 2          | 1.01 | 1.30 | 0.69 | 0.54 | 4  | 27.232  | 5.33  | 0.62 | 4 |
| F4J8L7     | Aha1 domain-containing protein                  | 1.69 | 1.39 | 0.74 | 0.89 | 2  | 35.772  | 5.71  | 0.27 | 1 |
| F4K3X1     | Ubiquitin-specific protease 12                  | 1.32 | 2.38 | 0.79 | 0.44 | 1  | 115.079 | 5.68  | 0.04 | 1 |
| F4K5C7     | 40S ribosomal protein S4                        | 0.78 | 1.19 | 1.67 | 1.09 | 12 | 27.69   | 9.99  | 2.36 | 7 |
| F4K7D6     | S-(hydroxymethyl)glutathione dehydrogenase      | 1.42 | 0.87 | 0.98 | 1.60 | 3  | 42.016  | 6.95  | 0.23 | 2 |
| F4K8S2     | RmlC-like cupins superfamily protein            | 1.85 | 1.15 | 0.72 | 1.16 | 9  | 31.626  | 8.81  | 0.36 | 1 |
| F4KAM0     | 60S acidic ribosomal protein family             | 1.78 | 1.14 | 0.76 | 1.18 | 2  | 8.939   | 5.29  | 0.78 | 1 |
| F4KDR2     | Ribosomal L29 family protein                    | 0.75 | 0.97 | 1.61 | 1.24 | 1  | 17.011  | 10.56 | 0.29 | 1 |
| O04630     | Threonine--tRNA ligase, mitochondrial 1         | 1.14 | 1.61 | 0.71 | 0.70 | 2  | 80.885  | 6.98  | 0.11 | 2 |
| O22793     | MORF2                                           | 0.79 | 1.57 | 0.72 | 0.68 | 1  | 24.699  | 8.24  | 0.21 | 1 |
| P25864     | 50S ribosomal protein L9, chloroplastic         | 1.86 | 1.26 | 0.74 | 1.09 | 5  | 22.12   | 9.67  | 1.15 | 3 |
| P34789     | 40S ribosomal protein S28-2                     | 1.73 | 1.35 | 0.72 | 0.93 | 1  | 7.336   | 11.17 | 0.59 | 1 |
| P38666     | 60S ribosomal protein L24-2                     | 0.85 | 1.21 | 1.65 | 1.15 | 5  | 18.62   | 10.78 | 3.22 | 3 |
| P41127     | 60S ribosomal protein L13-1                     | 0.89 | 1.27 | 1.58 | 1.10 | 5  | 23.752  | 11.02 | 0.70 | 2 |
| P42643     | 14-3-3-like protein GF14 chi                    | 1.24 | 1.44 | 2.10 | 1.46 | 21 | 29.913  | 4.81  | 2.16 | 1 |
| P51420     | 60S ribosomal protein L31-3                     | 0.89 | 1.10 | 1.57 | 1.27 | 1  | 13.795  | 9.95  | 0.59 | 1 |

|                                        |                                                                             |      |      |      |      |    |        |       |      |   |
|----------------------------------------|-----------------------------------------------------------------------------|------|------|------|------|----|--------|-------|------|---|
| P57691                                 | 60S acidic ribosomal protein P0-3                                           | 1.10 | 1.62 | 0.71 | 0.69 | 10 | 34.369 | 5.15  | 2.73 | 4 |
| P59224                                 | 40S ribosomal protein S13-2                                                 | 0.84 | 1.15 | 1.66 | 1.22 | 5  | 17.074 | 10.39 | 2.16 | 4 |
| P59231                                 | 60S ribosomal protein L10a-3                                                | 2.63 | 1.18 | 0.36 | 0.79 | 2  | 24.516 | 9.82  | 0.36 | 2 |
| P60040                                 | 60S ribosomal protein L7-2                                                  | 0.87 | 1.19 | 1.61 | 1.18 | 14 | 28.153 | 9.94  | 2.16 | 3 |
| Q07099                                 | Serine/threonine-protein phosphatase<br>PP2A-1 catalytic subunit            | 1.04 | 1.47 | 2.32 | 1.37 | 1  | 34.938 | 4.96  | 0.12 | 1 |
| Q0WRE5                                 | Ribosomal protein L17-like protein                                          | 0.76 | 1.26 | 1.58 | 0.95 | 8  | 19.842 | 10.11 | 2.98 | 4 |
| Q0WRH6                                 | 60S ribosomal protein L22-like                                              | 1.11 | 1.47 | 0.69 | 0.52 | 1  | 14.038 | 9.55  | 0.33 | 1 |
| Q1H5F7                                 | Histone H2B OS=Arabidopsis thaliana<br>PE=2 SV=1                            | 0.83 | 0.99 | 1.70 | 1.41 | 3  | 15.723 | 10.05 | 0.59 | 2 |
| Q29Q46                                 | At3g56190                                                                   | 1.05 | 0.77 | 1.20 | 1.64 | 4  | 32.734 | 5.33  | 0.45 | 4 |
| Q39142                                 | Chlorophyll a-b binding protein,<br>chloroplastic                           | 0.82 | 1.24 | 1.58 | 1.05 | 7  | 28.152 | 5.27  | 1.31 | 1 |
| Q3E6Z1                                 | S-adenosyl-L-methionine-dependent<br>methyltransferases superfamily protein | 1.42 | 0.48 | 1.59 | 1.38 | 2  | 16.703 | 5.86  | 0.47 | 2 |
| Q41969                                 | Eukaryotic translation initiation factor<br>2 subunit beta                  | 1.25 | 2.04 | 1.30 | 0.79 | 2  | 30.644 | 7.2   | 0.31 | 2 |
| Q42064                                 | 60S ribosomal protein L8-3                                                  | 0.69 | 1.29 | 2.12 | 1.14 | 13 | 27.931 | 10.83 | 1.78 | 1 |
| Q42347                                 | 60S ribosomal protein L24-1                                                 | 0.84 | 1.19 | 1.66 | 1.18 | 5  | 18.838 | 10.7  | 4.18 | 3 |
| Q5PNZ9                                 | At1g22780                                                                   | 0.86 | 1.06 | 1.63 | 1.32 | 3  | 17.534 | 10.54 | 1.00 | 3 |
| Q6NPL0                                 | At4g09040                                                                   | 0.56 | 0.70 | 0.90 | 0.72 | 1  | 34.011 | 7.59  | 0.18 | 1 |
| Q8VYK6                                 | 40S ribosomal protein S4-3                                                  | 0.79 | 1.18 | 1.65 | 1.10 | 10 | 29.797 | 10.21 | 1.51 | 6 |
| Q8VZB9                                 | 60S ribosomal protein L10a-1                                                | 1.74 | 1.18 | 0.36 | 1.12 | 2  | 24.453 | 9.88  | 0.36 | 2 |
| Q8W4A0                                 | Eukaryotic translation initiation factor<br>3 subunit M                     | 1.94 | 1.95 | 0.73 | 0.73 | 1  | 46.755 | 5.12  | 0.09 | 1 |
| Q93VH9                                 | 40S ribosomal protein S4-1                                                  | 0.72 | 1.18 | 1.67 | 1.02 | 12 | 29.784 | 10.17 | 2.16 | 7 |
| Q93VI3                                 | 60S ribosomal protein L17-1                                                 | 0.89 | 1.24 | 1.57 | 1.13 | 8  | 19.885 | 10.11 | 2.98 | 4 |
| Q9C9C6                                 | 60S ribosomal protein L6-2                                                  | 1.94 | 1.91 | 0.72 | 0.73 | 3  | 25.992 | 10.17 | 0.44 | 2 |
| Q9FF90                                 | 60S ribosomal protein L13-3                                                 | 0.83 | 1.25 | 1.57 | 1.04 | 9  | 23.471 | 11    | 1.89 | 4 |
| Q9FFC0                                 | Histone H2B                                                                 | 0.70 | 0.99 | 1.72 | 1.21 | 3  | 15.765 | 10.05 | 0.59 | 2 |
| Q9FJP3                                 | 50S ribosomal protein L29,<br>chloroplastic                                 | 2.39 | 0.89 | 0.35 | 0.95 | 2  | 19.365 | 10.51 | 0.78 | 2 |
| Q9FK91                                 | Poly [ADP-ribose] polymerase 3                                              | 0.83 | 1.87 | 0.98 | 0.87 | 4  | 91.347 | 5.22  | 0.21 | 1 |
| Q9FZ76                                 | 60S ribosomal protein L6-1                                                  | 1.08 | 2.04 | 0.96 | 0.82 | 1  | 26.136 | 10.1  | 0.12 | 1 |
| Q9LQQ4                                 | Histone H2B.1                                                               | 0.70 | 0.99 | 1.71 | 1.21 | 3  | 16.392 | 10.05 | 0.67 | 2 |
| Q9LSA3                                 | 60S ribosomal protein L30-3                                                 | 1.05 | 1.68 | 0.93 | 0.74 | 4  | 12.271 | 9.69  | 1.37 | 3 |
| Q9LVC9                                 | 60S acidic ribosomal protein P3-2                                           | 1.83 | 1.14 | 0.75 | 1.19 | 2  | 11.856 | 4.51  | 0.78 | 1 |
| Q9M0E0                                 | 40S ribosomal protein S15a-5                                                | 1.42 | 0.80 | 0.48 | 0.86 | 1  | 14.907 | 9.82  | 0.39 | 1 |
| Q9M0E2                                 | 60S ribosomal protein L28-2                                                 | 0.71 | 1.15 | 1.97 | 1.21 | 1  | 15.901 | 11.05 | 0.33 | 1 |
| Q9M9W1                                 | 60S ribosomal protein L22-2                                                 | 1.09 | 1.47 | 0.69 | 0.51 | 5  | 14.009 | 9.55  | 2.16 | 3 |
| Q9SF53                                 | 60S ribosomal protein L35-1                                                 | 0.75 | 0.97 | 1.61 | 1.23 | 2  | 14.276 | 10.92 | 0.93 | 2 |
| Q9SIK2                                 | 40S ribosomal protein S25-2                                                 | 0.69 | 0.90 | 1.88 | 1.44 | 3  | 12.062 | 10.7  | 1.15 | 1 |
| Q9SIW5                                 | 40S ribosomal protein S25-1                                                 | 0.75 | 0.97 | 1.88 | 1.45 | 3  | 12.119 | 10.58 | 1.15 | 1 |
| <b>Protein destination and storage</b> |                                                                             |      |      |      |      |    |        |       |      |   |
| P15460                                 | SESA4                                                                       | 1.82 | 1.04 | 0.76 | 1.32 | 3  | 19.17  | 7.5   | 0.52 | 1 |
| P94072                                 | Germin-like protein subfamily 3<br>member 3                                 | 1.40 | 1.72 | 1.46 | 1.35 | 4  | 21.822 | 6.76  | 1.37 | 2 |
| Q96318                                 | 12S seed storage protein CRC                                                | 2.09 | 1.14 | 0.68 | 1.25 | 24 | 58.199 | 6.99  | 0.74 | 4 |



|                                        |                                                                         |      |      |      |      |    |        |      |      |   |
|----------------------------------------|-------------------------------------------------------------------------|------|------|------|------|----|--------|------|------|---|
| R0IN30                                 | Putative germin                                                         | 2.02 | 1.35 | 0.68 | 1.02 | 1  | 23.474 | 8.25 | 0.23 | 1 |
| <b>Protein folding and degradation</b> |                                                                         |      |      |      |      |    |        |      |      |   |
| A0A178UBF4                             | Peptidyl-prolyl cis-trans isomerase SV=1                                | 1.29 | 1.52 | 0.80 | 0.68 | 4  | 21.947 | 9.06 | 0.70 | 1 |
| F4JD01                                 | Proteasome subunit beta type                                            | 1.60 | 1.41 | 0.81 | 0.92 | 2  | 24.669 | 7.81 | 0.39 | 2 |
| P42742                                 | Proteasome subunit beta type-1                                          | 1.60 | 1.42 | 0.80 | 0.91 | 2  | 24.628 | 7.4  | 0.39 | 2 |
| Q0WL80                                 | UDP-glucose:glycoprotein glucosyltransferase                            | 1.70 | 1.39 | 0.77 | 0.94 | 1  | 181.69 | 5.83 | 0.02 | 1 |
| Q38867                                 | Peptidyl-prolyl cis-trans isomerase CYP19-3                             | 2.69 | 1.39 | 1.17 | 1.47 | 2  | 18.908 | 7.81 | 0.39 | 2 |
| Q8VYL3                                 | Aspartic proteinase A2                                                  | 1.75 | 1.18 | 0.73 | 1.09 | 5  | 55.713 | 6.34 | 0.37 | 2 |
| <b>Secondary metabolism</b>            |                                                                         |      |      |      |      |    |        |      |      |   |
| A0A178US70                             | Phospho-2-dehydro-3-deoxyheptonate aldolase                             | 1.89 | 1.21 | 0.69 | 1.07 | 3  | 56.113 | 8.78 | 0.23 | 1 |
| A0A178V3B0                             | CAD5                                                                    | 0.95 | 0.72 | 1.42 | 1.88 | 1  | 38.718 | 5.67 | 0.12 | 1 |
| A0A178VB36                             | MTO1                                                                    | 1.79 | 2.42 | 0.72 | 0.53 | 1  | 59.881 | 6.87 | 0.08 | 1 |
| A0A178VHC7                             | GSA2                                                                    | 1.86 | 1.16 | 0.69 | 1.12 | 10 | 50.109 | 7.39 | 1.08 | 6 |
| A0A178VZE1                             | IPM12                                                                   | 1.77 | 1.67 | 1.61 | 1.71 | 2  | 27.026 | 6.11 | 0.33 | 2 |
| A0A178W930                             | Protein disulfide-isomerase                                             | 0.84 | 1.29 | 1.68 | 1.09 | 4  | 56.329 | 5    | 0.30 | 4 |
| A0A178WAV9                             | ASA1                                                                    | 1.65 | 1.20 | 0.88 | 1.21 | 2  | 53.604 | 6.61 | 0.15 | 1 |
| A0A1P8AU81                             | Rhodanese homologue 2                                                   | 2.02 | 1.13 | 0.70 | 1.24 | 1  | 32.126 | 6.8  | 0.12 | 1 |
| A0A1P8AU99                             | Rhodanese homologue 2                                                   | 1.90 | 1.13 | 0.69 | 1.16 | 1  | 29.433 | 5.8  | 0.14 | 1 |
| A0A1P8AY16                             | Ferredoxin thioredoxin reductase catalytic beta chain family protein    | 1.94 | 1.15 | 0.73 | 1.24 | 1  | 10.17  | 6.76 | 0.33 | 1 |
| A0A1P8AZM5                             | Alpha/beta-Hydrolases superfamily protein                               | 1.93 | 1.04 | 0.72 | 1.32 | 1  | 24.316 | 5.6  | 0.21 | 1 |
| A0A1P8AZN3                             | Alpha/beta-Hydrolases superfamily protein                               | 1.21 | 0.90 | 1.21 | 1.62 | 2  | 34.699 | 6.81 | 0.26 | 2 |
| A0A1P8AZP9                             | Alpha/beta-Hydrolases superfamily protein                               | 1.21 | 0.90 | 1.21 | 1.62 | 2  | 30.018 | 6.55 | 0.31 | 2 |
| A0A1P8AZS7                             | Thioredoxin reductase                                                   | 1.93 | 3.33 | 0.69 | 0.40 | 1  | 38.234 | 8.12 | 0.12 | 1 |
| A0A1P8B8I9                             | Pseudouridine synthase/archaeosine transglycosylase-like family protein | 1.54 | 0.82 | 0.89 | 1.67 | 5  | 57.49  | 8.51 | 0.40 | 1 |
| A0A1P8BCV2                             | Acetyl-coenzyme A synthetase                                            | 1.17 | 0.72 | 1.22 | 1.99 | 4  | 67.555 | 5.27 | 0.33 | 3 |
| A8MR47                                 | Sulfurtransferase                                                       | 1.91 | 1.04 | 0.73 | 1.34 | 3  | 31.69  | 7.39 | 0.47 | 3 |
| A8MRF8                                 | Sulfite oxidase                                                         | 1.97 | 0.90 | 0.70 | 1.53 | 2  | 26.628 | 5.44 | 0.33 | 2 |
| B0LQB5                                 | Malate synthase (Fragment)                                              | 1.14 | 1.68 | 0.83 | 0.76 | 30 | 36.466 | 7.28 | 2.36 | 7 |
| F4I5V8                                 | ATP-citrate lyase A-1                                                   | 1.05 | 1.61 | 0.85 | 0.73 | 3  | 49.018 | 5.59 | 0.32 | 1 |
| F4JLA9                                 | Cruciferin 3                                                            | 1.87 | 1.10 | 0.70 | 1.19 | 24 | 50.031 | 7.14 | 0.96 | 4 |
| O23324                                 | ATP-sulfurylase 3, chloroplastic                                        | 1.54 | 0.82 | 0.88 | 1.64 | 5  | 51.997 | 7.4  | 0.51 | 1 |
| O65782                                 | Cytochrome P450 83B1                                                    | 1.61 | 1.34 | 0.75 | 0.90 | 1  | 56.81  | 8.37 | 0.07 | 1 |
| Q5XF32                                 | 3-isopropylmalate dehydrogenase                                         | 1.85 | 1.03 | 1.82 | 3.27 | 3  | 44.134 | 6.01 | 0.39 | 1 |
| Q8LDW8                                 | Probable hydroxyacylglutathione hydrolase 2, chloroplastic              | 1.24 | 0.89 | 1.59 | 2.23 | 1  | 36.602 | 8.12 | 0.14 | 1 |
| Q8LEF4                                 | 3-isopropylmalate dehydrogenase                                         | 2.07 | 2.15 | 1.37 | 1.32 | 4  | 43.27  | 6.06 | 0.45 | 2 |
| Q9C8L4                                 | Persulfide dioxygenase ETHE1 homolog, mitochondrial                     | 1.90 | 1.14 | 0.72 | 1.21 | 4  | 32.312 | 7.01 | 0.72 | 3 |
| Q9C9D0                                 | Cytosolic sulfotransferase 16                                           | 1.62 | 1.77 | 1.84 | 1.68 | 1  | 39.194 | 5.62 | 0.11 | 1 |

|                                              |                                                                  |      |      |      |      |    |         |      |      |   |
|----------------------------------------------|------------------------------------------------------------------|------|------|------|------|----|---------|------|------|---|
| Q9FZ80                                       | Cytosolic sulfotransferase 17                                    | 1.88 | 0.92 | 1.55 | 3.16 | 1  | 39.887  | 6.47 | 0.10 | 1 |
| <b>Signal transduction and transcription</b> |                                                                  |      |      |      |      |    |         |      |      |   |
| A0A178UF94                                   | SUPO1                                                            | 1.80 | 1.15 | 0.73 | 1.14 | 4  | 43.482  | 6.46 | 0.43 | 4 |
| A0A1P8ANC0                                   | Hydroxypyruvate reductase                                        | 1.05 | 1.63 | 1.28 | 0.82 | 1  | 39.736  | 8.03 | 0.10 | 1 |
| F4IS32                                       | Acyl-[acyl-carrier-protein] desaturase                           | 1.37 | 0.72 | 0.84 | 1.60 | 6  | 45.622  | 6.64 | 0.53 | 4 |
| Q42479                                       | Calcium-dependent protein kinase 3                               | 1.11 | 1.62 | 0.95 | 0.79 | 1  | 59.299  | 6.37 | 0.08 | 1 |
| Q42546                                       | SAL1 phosphatase                                                 | 1.71 | 1.15 | 0.76 | 1.13 | 4  | 37.541  | 5.17 | 0.59 | 4 |
| Q95748                                       | NADH dehydrogenase [ubiquinone]<br>iron-sulfur protein 3         | 1.46 | 1.65 | 0.85 | 0.75 | 3  | 22.865  | 7.44 | 0.59 | 2 |
| Q9C820                                       | Ras-related protein RABG3d                                       | 0.75 | 1.17 | 1.86 | 1.19 | 3  | 23.054  | 5.33 | 0.54 | 3 |
| Q9FLM8                                       | DNA-directed RNA polymerases II, IV<br>and V subunit 12          | 2.05 | 1.19 | 0.70 | 1.20 | 1  | 5.893   | 8.18 | 1.15 | 1 |
| Q9FPT1                                       | Ubiquitin carboxyl-terminal hydrolase<br>12                      | 1.31 | 1.94 | 0.80 | 0.91 | 1  | 130.525 | 5.77 | 0.04 | 1 |
| Q9LW76                                       | Ras-related protein RABG3c                                       | 0.75 | 1.16 | 1.86 | 1.21 | 3  | 22.951  | 5.52 | 0.54 | 3 |
| <b>Transport</b>                             |                                                                  |      |      |      |      |    |         |      |      |   |
| A0A178UJ45                                   | NADH dehydrogenase [ubiquinone]<br>flavoprotein 1, mitochondrial | 0.70 | 1.34 | 1.52 | 0.78 | 2  | 53.415  | 8.16 | 0.16 | 2 |
| A0A178UV39                                   | Plasma membrane ATPase                                           | 0.75 | 1.43 | 1.58 | 0.83 | 7  | 104.335 | 6.99 | 0.29 | 2 |
| A0A178V5D7                                   | Plasma membrane ATPase                                           | 0.75 | 1.68 | 1.54 | 0.68 | 3  | 105.453 | 6.84 | 0.15 | 1 |
| A0A178VSN5                                   | Plasma membrane ATPase                                           | 0.89 | 1.35 | 1.57 | 1.03 | 9  | 104.158 | 6.7  | 0.40 | 4 |
| A0A178W1J5                                   | MEE4                                                             | 1.96 | 1.20 | 0.71 | 1.15 | 1  | 16.115  | 9.2  | 0.26 | 1 |
| A0A178W2W5                                   | Ferredoxin                                                       | 2.52 | 1.49 | 0.84 | 1.43 | 2  | 15.53   | 4.49 | 0.93 | 1 |
| A0A178W5B2                                   | Sulfurtransferase                                                | 1.93 | 0.98 | 0.68 | 1.35 | 1  | 34.695  | 5.27 | 0.13 | 1 |
| A0A178W776                                   | Plasma membrane ATPase                                           | 0.99 | 1.52 | 1.05 | 0.69 | 2  | 104.749 | 6.43 | 0.10 | 1 |
| A0A178WA14                                   | VHP1                                                             | 1.16 | 1.49 | 1.93 | 1.41 | 1  | 80.768  | 5.26 | 0.08 | 1 |
| A0A178WBD4                                   | CURT1C                                                           | 1.22 | 1.61 | 0.87 | 0.72 | 1  | 16.935  | 9.04 | 0.26 | 1 |
| A0A1I9LS30                                   | Plasma membrane ATPase                                           | 0.88 | 1.84 | 1.55 | 0.74 | 3  | 105.439 | 6.84 | 0.15 | 1 |
| A0A1P8AYX4                                   | Plasma membrane ATPase                                           | 0.89 | 1.35 | 1.57 | 1.03 | 9  | 96.797  | 7.12 | 0.45 | 4 |
| A0A1P8B2U9                                   | Plasma membrane ATPase                                           | 0.90 | 1.91 | 1.56 | 0.73 | 3  | 102.597 | 7.5  | 0.14 | 1 |
| A0A1P8B2V0                                   | Plasma membrane ATPase                                           | 0.78 | 1.20 | 1.67 | 1.08 | 2  | 76.458  | 9.03 | 0.12 | 0 |
| A0A1P8B2Y6                                   | Plasma membrane ATPase                                           | 0.90 | 1.96 | 1.54 | 0.70 | 3  | 109.823 | 7.27 | 0.13 | 1 |
| A8MQH1                                       | Inorganic H pyrophosphatase family<br>protein                    | 1.16 | 1.44 | 1.93 | 1.43 | 1  | 67.663  | 5.17 | 0.10 | 1 |
| F4J0D8                                       | V-type proton ATPase subunit                                     | 0.78 | 1.37 | 1.67 | 0.95 | 2  | 40.019  | 5.05 | 0.27 | 2 |
| F4JPJ7                                       | Plasma membrane ATPase                                           | 0.76 | 1.48 | 1.59 | 0.81 | 5  | 108.247 | 7.14 | 0.18 | 2 |
| G1C2X2                                       | Nad9                                                             | 1.42 | 1.59 | 0.88 | 0.78 | 3  | 22.674  | 7.5  | 0.59 | 2 |
| O04090                                       | Ferredoxin-1, chloroplastic                                      | 1.68 | 1.38 | 1.05 | 1.28 | 2  | 15.887  | 4.54 | 0.93 | 1 |
| O82209                                       | Copia-like retroelement<br>polyprotein                           | 1.69 | 1.35 | 0.83 | 1.04 | 1  | 13.838  | 9.04 | 0.23 | 1 |
| P20431                                       | ATPase 3, plasma membrane-type                                   | 1.01 | 2.02 | 1.03 | 0.72 | 5  | 104.384 | 7.18 | 0.24 | 1 |
| P56778                                       | Photosystem II CP43 reaction center<br>protein                   | 1.66 | 1.19 | 0.54 | 0.75 | 1  | 51.835  | 7.2  | 0.16 | 1 |
| Q39242                                       | Thioredoxin reductase 2                                          | 1.93 | 3.32 | 0.70 | 0.41 | 1  | 40.61   | 6.7  | 0.12 | 1 |
| Q3E6Q3                                       | Ras-related small GTP-binding family<br>protein                  | 1.85 | 1.32 | 0.72 | 1.02 | 5  | 13.817  | 5.07 | 1.37 | 1 |
| Q3ZVD9                                       | ATPase beta subunit (Fragment)                                   | 0.74 | 1.19 | 1.63 | 1.01 | 15 | 16.677  | 8.76 | 4.01 | 4 |
| Q42599                                       | NADH dehydrogenase [ubiquinone]                                  | 1.90 | 1.92 | 0.69 | 0.69 | 2  | 25.487  | 5.41 | 0.27 | 2 |

|              |                                                                                                                  |      |      |      |      |    |         |      |      |   |
|--------------|------------------------------------------------------------------------------------------------------------------|------|------|------|------|----|---------|------|------|---|
| Q8LB02       | iron-sulfur protein 8-A, mitochondrial Succinate dehydrogenase [ubiquinone] iron-sulfur subunit 2, mitochondrial | 1.69 | 0.81 | 0.76 | 1.57 | 4  | 31.121  | 8.62 | 0.39 | 2 |
| Q8LBZ7       | Succinate dehydrogenase [ubiquinone] iron-sulfur subunit 1, mitochondrial                                        | 1.66 | 0.81 | 0.76 | 1.55 | 4  | 31.151  | 8.44 | 0.39 | 2 |
| Q96250       | ATP synthase subunit gamma, mitochondrial                                                                        | 1.29 | 1.68 | 0.81 | 0.85 | 6  | 35.426  | 8.9  | 0.73 | 5 |
| Q96252       | ATP synthase subunit delta', mitochondrial                                                                       | 1.92 | 1.22 | 0.70 | 1.10 | 1  | 21.534  | 6.7  | 0.29 | 1 |
| Q9FKS5       | Cytochrome c1 2, heme protein, mitochondrial                                                                     | 1.94 | 1.36 | 0.73 | 1.04 | 3  | 33.669  | 6.18 | 0.59 | 1 |
| Q9FZ27       | Germin-like protein subfamily 2 member 2                                                                         | 1.79 | 1.35 | 0.72 | 0.96 | 1  | 23.426  | 8.56 | 0.23 | 1 |
| Q9LHA4       | V-type proton ATPase subunit d2                                                                                  | 0.84 | 1.28 | 1.67 | 1.09 | 2  | 40.761  | 5.11 | 0.26 | 2 |
| Q9LJI5       | V-type proton ATPase subunit d1                                                                                  | 0.85 | 1.28 | 1.65 | 1.09 | 2  | 40.765  | 5.16 | 0.26 | 2 |
| Q9SH76       | ATPase 6, plasma membrane-type                                                                                   | 0.89 | 1.00 | 1.58 | 1.40 | 4  | 104.946 | 6.19 | 0.20 | 0 |
| Q9SJB3       | ATPase 5, plasma membrane-type                                                                                   | 0.86 | 1.62 | 1.59 | 0.84 | 3  | 104.673 | 7.23 | 0.14 | 1 |
| Q9STR3       | Copia-like retroelement pol polyprotein                                                                          | 1.93 | 1.36 | 0.68 | 0.96 | 1  | 13.86   | 9.03 | 0.26 | 1 |
| Q9T0E0       | Putative ATPase, plasma membrane-like                                                                            | 0.83 | 1.00 | 1.56 | 1.30 | 1  | 90.381  | 6.8  | 0.05 | 1 |
| <b>Other</b> |                                                                                                                  |      |      |      |      |    |         |      |      |   |
| A0A178UD67   | RPS10B                                                                                                           | 0.71 | 1.43 | 1.68 | 0.83 | 3  | 19.721  | 9.73 | 0.87 | 2 |
| A0A178VPH3   | DJ1A                                                                                                             | 2.04 | 1.03 | 0.71 | 1.39 | 2  | 41.831  | 5.41 | 0.23 | 1 |
| A0A178W8B7   | SERPIN1                                                                                                          | 1.25 | 1.57 | 0.78 | 0.71 | 2  | 42.613  | 5.08 | 0.22 | 2 |
| A0A178WB84   | SDH6                                                                                                             | 1.49 | 1.57 | 0.70 | 0.69 | 1  | 15.803  | 6.8  | 0.29 | 1 |
| A0A178WHX3   | RACK1A_AT                                                                                                        | 1.16 | 1.57 | 1.02 | 0.75 | 15 | 35.725  | 7.71 | 2.33 | 5 |
| A0A178WKK0   | Sulfurtransferase                                                                                                | 2.02 | 1.11 | 0.70 | 1.26 | 3  | 35.606  | 5.25 | 0.39 | 3 |
| A0A178WMJ3   | GSTU21                                                                                                           | 1.99 | 1.14 | 0.72 | 1.26 | 3  | 25.787  | 5.52 | 0.36 | 1 |
| A0A178WPQ4   | COX6B                                                                                                            | 1.87 | 1.30 | 0.71 | 1.02 | 1  | 21.182  | 4.34 | 0.26 | 1 |
| A0A1P8AXQ5   | Acetone-cyanohydrin lyase                                                                                        | 1.95 | 1.82 | 0.70 | 0.75 | 4  | 31.379  | 5.74 | 0.31 | 1 |
| A0A1P8AXW0   | Acetone-cyanohydrin lyase                                                                                        | 1.95 | 1.82 | 0.72 | 0.77 | 4  | 20.818  | 6.42 | 0.52 | 1 |
| A0A1P8B993   | Aldolase-type TIM barrel family protein                                                                          | 1.05 | 1.34 | 0.75 | 0.59 | 11 | 28.96   | 8.65 | 2.16 | 1 |
| A0A2J6L3W0   | 4-methyl-5(B-hydroxyethyl)-thiazole monophosphate biosynthesis protein (Fragment)                                | 1.96 | 1.06 | 0.71 | 1.32 | 2  | 14.445  | 8.43 | 0.59 | 1 |
| A0A432SLV3   | Glyceraldehyde-3-phosphate dehydrogenase (Fragment)                                                              | 1.34 | 1.79 | 0.92 | 0.68 | 9  | 14.226  | 5.01 | 9.00 | 3 |
| A8MRV0       | RNA binding Plectin/S10 domain-containing protein                                                                | 0.83 | 1.00 | 1.68 | 1.40 | 2  | 14.344  | 9.74 | 0.93 | 1 |
| B2CT24       | APS1 (Fragment)                                                                                                  | 1.57 | 1.34 | 0.84 | 0.99 | 3  | 16.904  | 6.33 | 1.00 | 2 |
| B2CT25       | APS1 (Fragment)                                                                                                  | 1.57 | 1.34 | 0.84 | 0.99 | 3  | 16.918  | 6.81 | 1.00 | 2 |
| B2CT32       | APS1 (Fragment)                                                                                                  | 1.57 | 1.34 | 0.84 | 0.99 | 3  | 16.89   | 6.33 | 1.00 | 2 |
| B2CT35       | APS1 (Fragment)                                                                                                  | 1.57 | 1.34 | 0.84 | 0.99 | 3  | 16.919  | 6.33 | 1.00 | 2 |
| F4HRK0       | Glyoxalase II 3                                                                                                  | 1.91 | 1.04 | 0.68 | 1.24 | 3  | 32.338  | 7.01 | 0.50 | 2 |
| F4J2B4       | Proteasome component (PCI) domain protein                                                                        | 1.93 | 1.97 | 0.70 | 0.69 | 1  | 41.13   | 5.07 | 0.10 | 1 |
| Q9LVM3       | YCF54                                                                                                            | 1.12 | 1.67 | 1.20 | 0.80 | 3  | 24.089  | 8.1  | 0.19 | 1 |

---

|        |                           |         |         |      |      |      |      |    |        |      |      |   |
|--------|---------------------------|---------|---------|------|------|------|------|----|--------|------|------|---|
| R0GMJ8 | SDH6                      |         |         | 1.45 | 1.62 | 0.73 | 0.72 | 1  | 18.659 | 6.92 | 0.33 | 1 |
| S8DQ99 | TAT-binding<br>(Fragment) | protein | homolog | 0.80 | 1.06 | 1.75 | 1.32 | 1  | 7.631  | 5.45 | 0.59 | 1 |
| V4MZ55 | GSTF3                     |         |         | 1.84 | 1.14 | 0.70 | 1.13 | 12 | 26.578 | 6.81 | 1.58 | 4 |

---

30

31

32

33

34
